# Supplementary material for: Comprehensive innate immune profiling of chikungunya virus infection in pediatric cases
Source: PubMed Central journal article supplement (PMC6110311; doi:10.15252/msb.20177862), 2018-08-27
Supplement: MSB-14-e7862-s001.pdf [file MSB-14-e7862-s001.pdf]

# 1 Appendix

2 Comprehensive innate immune profiling of chikungunya virus infection in  
3 pediatric cases

## 4 Authors

5 Daniela Michlmayr,<sup>\*1</sup> Theodore R. Pak,<sup>\*2</sup> Adeb H. Rahman,<sup>2,3</sup> El-Ad David Amir,<sup>2,3</sup> Eun-Young  
6 Kim,<sup>4</sup> Seunghee Kim-Schulze,<sup>2,3</sup> Maria Suprun,<sup>5</sup> Michael G. Stewart,<sup>4</sup> Guajira P. Thomas,<sup>4</sup>  
7 Angel Balmaseda,<sup>6</sup> Li Wang,<sup>2</sup> Jun Zhu,<sup>2</sup> Mayte Suarez-Fariñas,<sup>2,5</sup> Steven M. Wolinsky,<sup>4</sup> Andrew  
8 Kasarskis,<sup>2</sup> and Eva Harris<sup>1#</sup>

9

10 \* These authors contributed equally to this work.

11 # Corresponding author: Eva Harris, PhD; Division of Infectious Diseases and Vaccinology,  
12 School of Public Health, University of California, Berkeley, 185 Li Ka Shing Center, 1951 Oxford  
13 Street, Berkeley, CA 94720-3370; email: [eharris@berkeley.edu](mailto:eharris@berkeley.edu); phone: (510) 642-4845

14

15 <sup>1</sup> Division of Infectious Diseases and Vaccinology, School of Public Health, University of  
16 California, Berkeley, CA, 94720, USA

17 <sup>2</sup> Department of Genetics and Genomic Sciences, Icahn School of Medicine at Mount Sinai,  
18 New York, NY, 10029, USA

19 <sup>3</sup> Human Immune Monitoring Center, Icahn School of Medicine at Mount Sinai, New York, NY,  
20 10029, USA

21 <sup>4</sup> Division of Infectious Diseases, Department of Medicine, Northwestern University Feinberg  
22 School of Medicine, Chicago, IL, 60611, USA

23 <sup>5</sup> Department of Population Health and Science Policy, Icahn School of Medicine at Mount  
24 Sinai, New York, NY, 10029, USA

25 <sup>6</sup> Laboratorio Nacional de Virología, Centro Nacional de Diagnóstico y Referencia, Ministerio de  
26 Salud, Managua, Nicaragua

27

## 28 Appendix Table of Contents

|    |                          |    |
|----|--------------------------|----|
| 29 | Appendix Figures .....   | 3  |
| 30 | Appendix Figure S1.....  | 4  |
| 31 | Appendix Figure S2.....  | 5  |
| 32 | Appendix Figure S3.....  | 6  |
| 33 | Appendix Figure S4.....  | 7  |
| 34 | Appendix Figure S5.....  | 8  |
| 35 | Appendix Figure S6.....  | 10 |
| 36 | Appendix Figure S7.....  | 11 |
| 37 | Appendix Figure S8.....  | 12 |
| 38 | Appendix Figure S9.....  | 13 |
| 39 | Appendix Figure S10..... | 14 |
| 40 | Appendix Figure S11..... | 15 |
| 41 | Appendix Figure S12..... | 16 |
| 42 | Appendix Figure S13..... | 17 |
| 43 | Appendix Figure S14..... | 18 |
| 44 | Appendix Figure S16..... | 20 |
| 45 | Appendix Figure S17..... | 21 |
| 46 | Appendix Figure S18..... | 22 |
| 47 | Appendix Figure S19..... | 23 |
| 48 | Appendix Figure S20..... | 24 |
| 49 | Appendix Figure S21..... | 25 |
| 50 | Appendix Figure S22..... | 26 |
| 51 | Appendix Figure S23..... | 27 |
| 52 | Appendix Figure S24..... | 28 |
| 53 | Appendix Figure S25..... | 29 |
| 54 | Appendix Figure S26..... | 30 |
| 55 | Appendix Figure S27..... | 31 |
| 56 | Appendix Figure S28..... | 32 |
| 57 | Appendix Figure S29..... | 33 |
| 58 | Appendix Figure S30..... | 34 |
| 59 |                          |    |





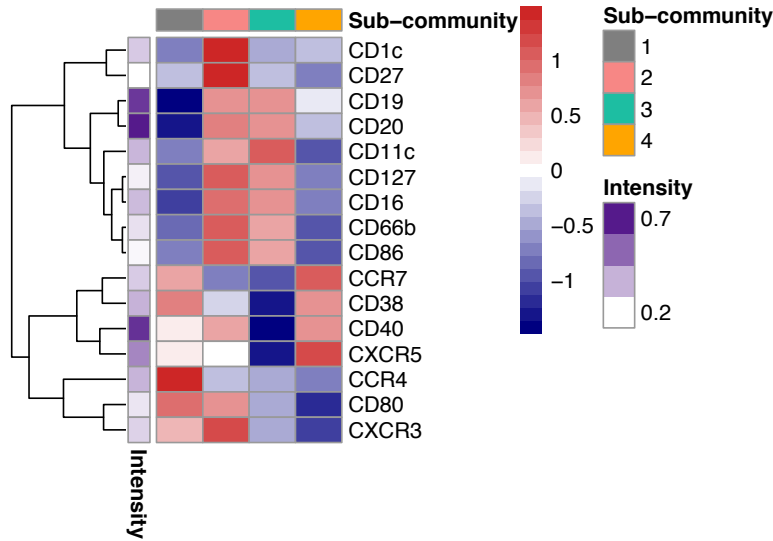

71

72 **Appendix Figure S2.**

73 Heatmap of differences in marker protein expression between four naïve B cell sub-  
 74 communities identified by MetaHybridLouvain. All channels listed here differentiate sub-  
 75 community 4 from the median value for the other three sub-communities at a threshold of fold  
 76 change > 1.5 and FDR < 0.05 (using a moderated paired t-test under the mixed effects model).  
 77 Colors represent log<sub>2</sub> fold change in channel intensity from the median for all communities (red  
 78 means higher intensity). Notably, sub-community 4 is characterized by a much higher  
 79 expression of CXCR5 as compared to all other sub-communities of naïve B cells. Otherwise, its  
 80 marker expression is very similar to sub-community 1 of naïve B cells, albeit with much lower  
 81 expression of CCR4, CXCR3 and CD80.

82

83

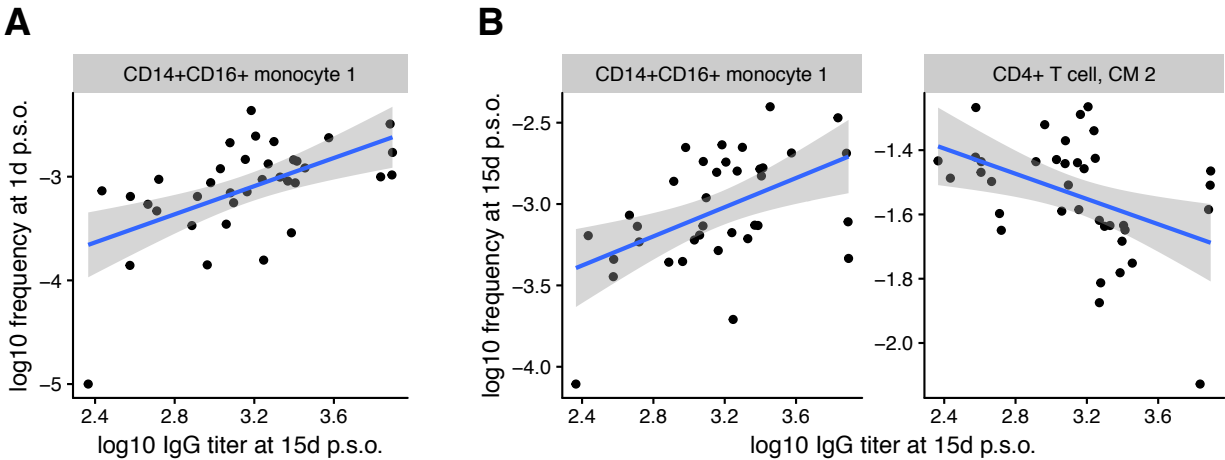

84

85 **Appendix Figure S3.**

86 Correlations between acute-phase cell sub-community frequencies and log<sub>10</sub> CHIKV antibody

87 titer at 15d post-symptom onset (p.s.o.). *A*, Scatterplot of log<sub>10</sub> cell sub-community frequencies

88 at 1d p.s.o. against log<sub>10</sub> CHIKV antibody titer at the 15d timepoint for CD14<sup>+</sup>CD16<sup>+</sup> monocyte

89 sub-community 1. This is the only correlation that is significant after multiple hypothesis

90 correction (FDR  $P = 0.0050$ , Spearman's  $\rho = 0.60$ ). *B*, Scatterplot as in *A* but for two sub-

91 communities that have significant correlations at the 15d p.s.o. timepoint: again, CD14<sup>+</sup>CD16<sup>+</sup>

92 monocyte sub-community 1 (FDR  $P = 0.035$ ,  $\rho = 0.51$ ), and central memory CD4<sup>+</sup> T cell sub-

93 community 2 (FDR  $P = 0.035$ ,  $\rho = -0.52$ ).

94

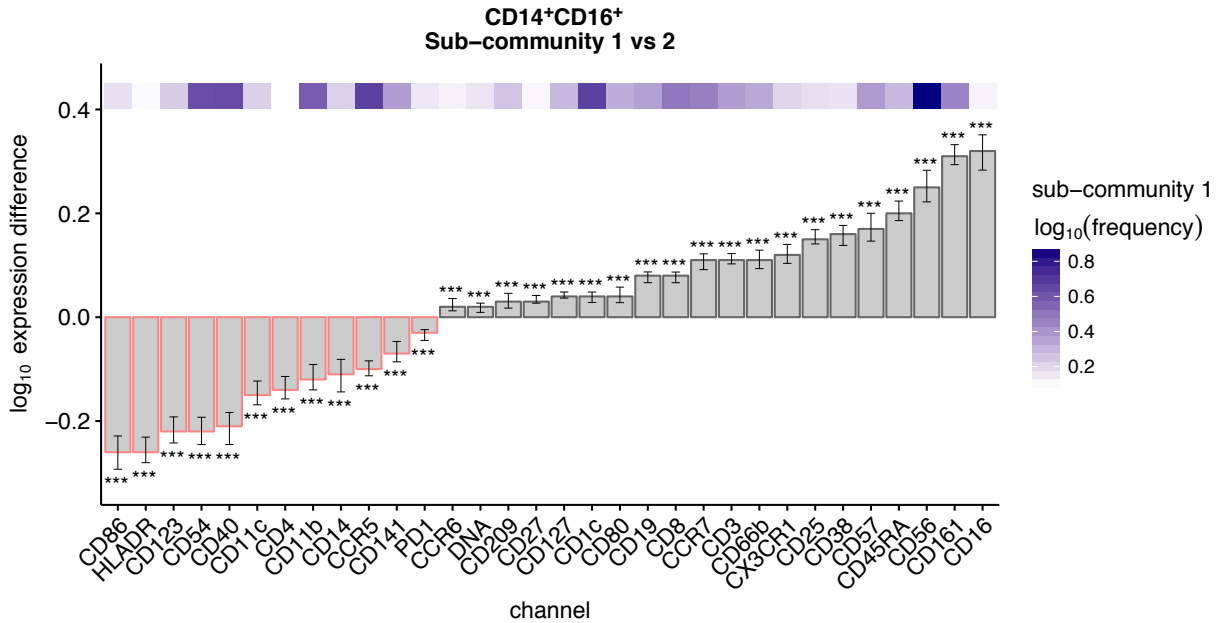

95

96 **Appendix Figure S4.**

97 Differences in per-sample protein expression between two CD14<sup>+</sup>CD16<sup>+</sup> sub-communities

98 identified by MetaHybridLouvain on CyTOF data. 1 corresponds with the “intermediate”

99 CD14<sup>++</sup>CD16<sup>+</sup> phenotype, while 2 corresponds with the “nonclassical” CD14<sup>+</sup>CD16<sup>++</sup> phenotype.

100 The X axis is filtered to channels with differences significant at FDR < 0.05, and ordered from

101 differences where sub-community 1 > 2 on the left to sub-community 1 < 2 on the right; i.e., red

102 bars are “intermediate”-associated markers while gray bars are “nonclassical”-associated

103 markers. Error bars correspond to 95% confidence intervals. \*, FDR-adjusted *P* (FDR *P*) < 0.05;

104 \*\*, FDR *P* < 0.01, \*\*\*, FDR *P* < 0.001.

105

106

MetaHybridLouvain: cd14\_cd16\_monocyte\_1

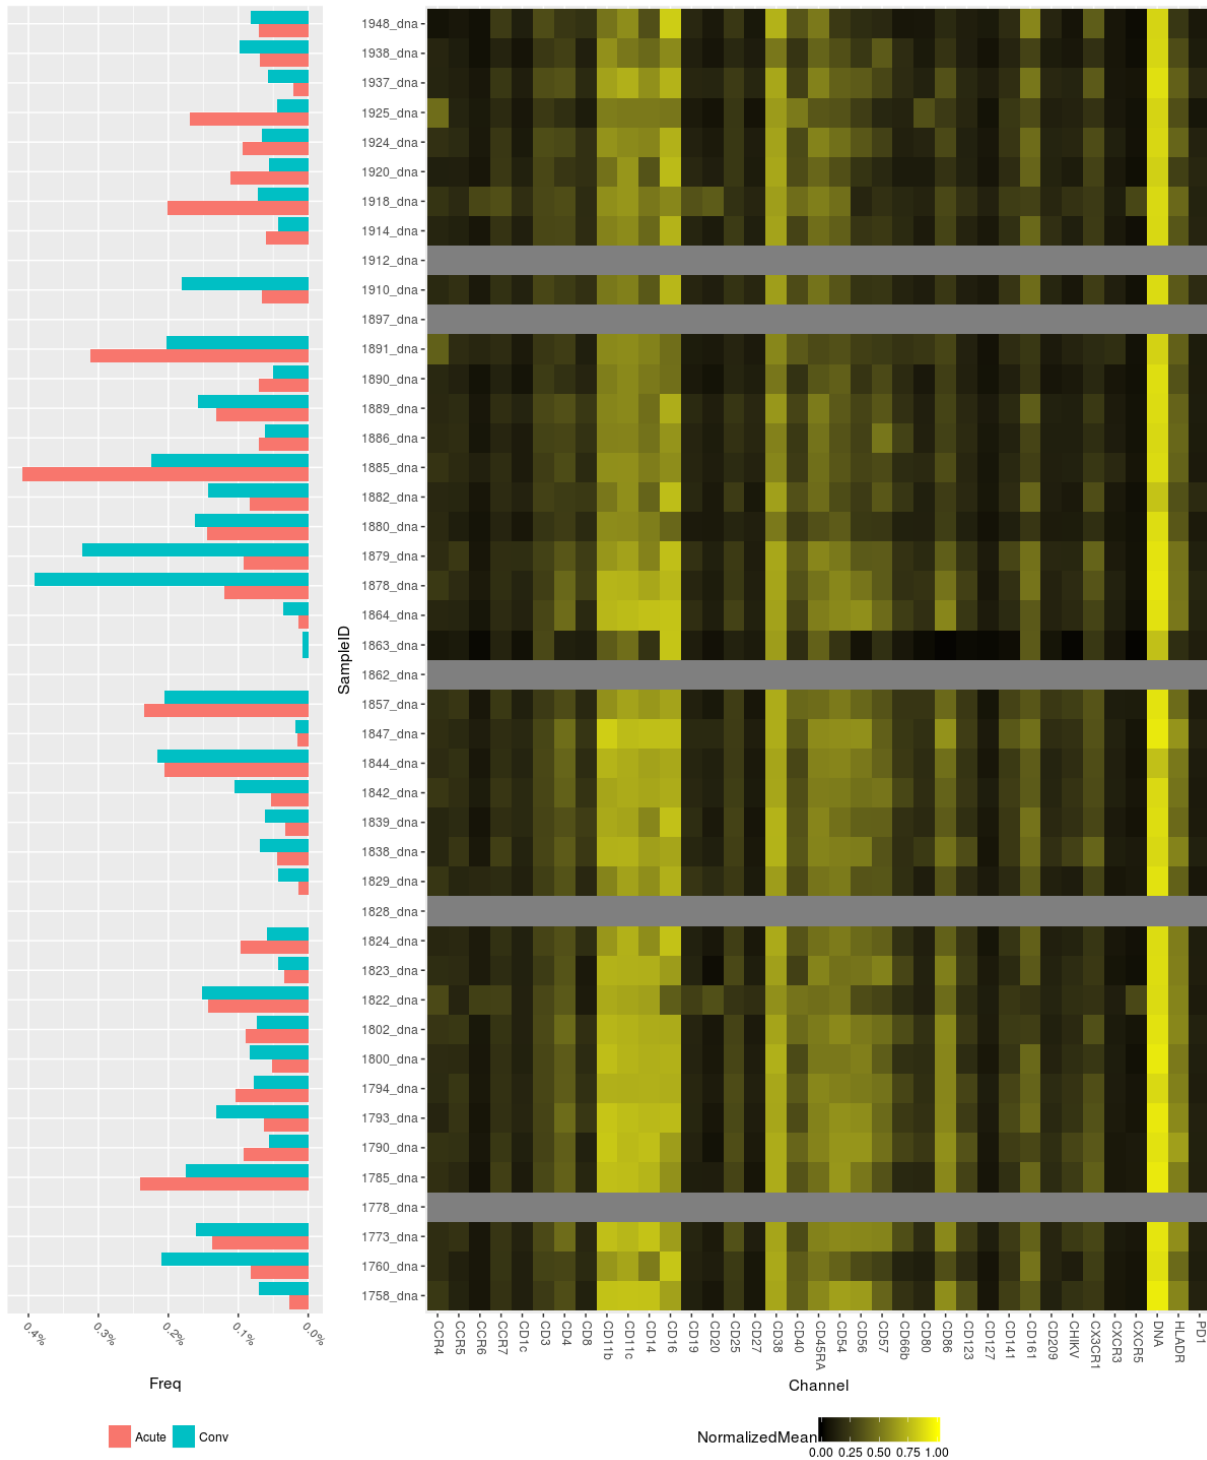

107

108 **Appendix Figure S5.**

109 Summary of frequencies (per timepoint) and mean channel values for sub-community 1 of

110 CD14<sup>+</sup>CD16<sup>+</sup> monocytes, across all samples. At left, frequencies in each sample split by



111 timepoint; at right, within each row, heatmaps of the distribution of channel values for all events  
112 within this sub-community for each sample. A gray row indicates this sub-community was not  
113 identified in this sample.

MetaHybridLouvain: cd14\_cd16\_monocyte\_2

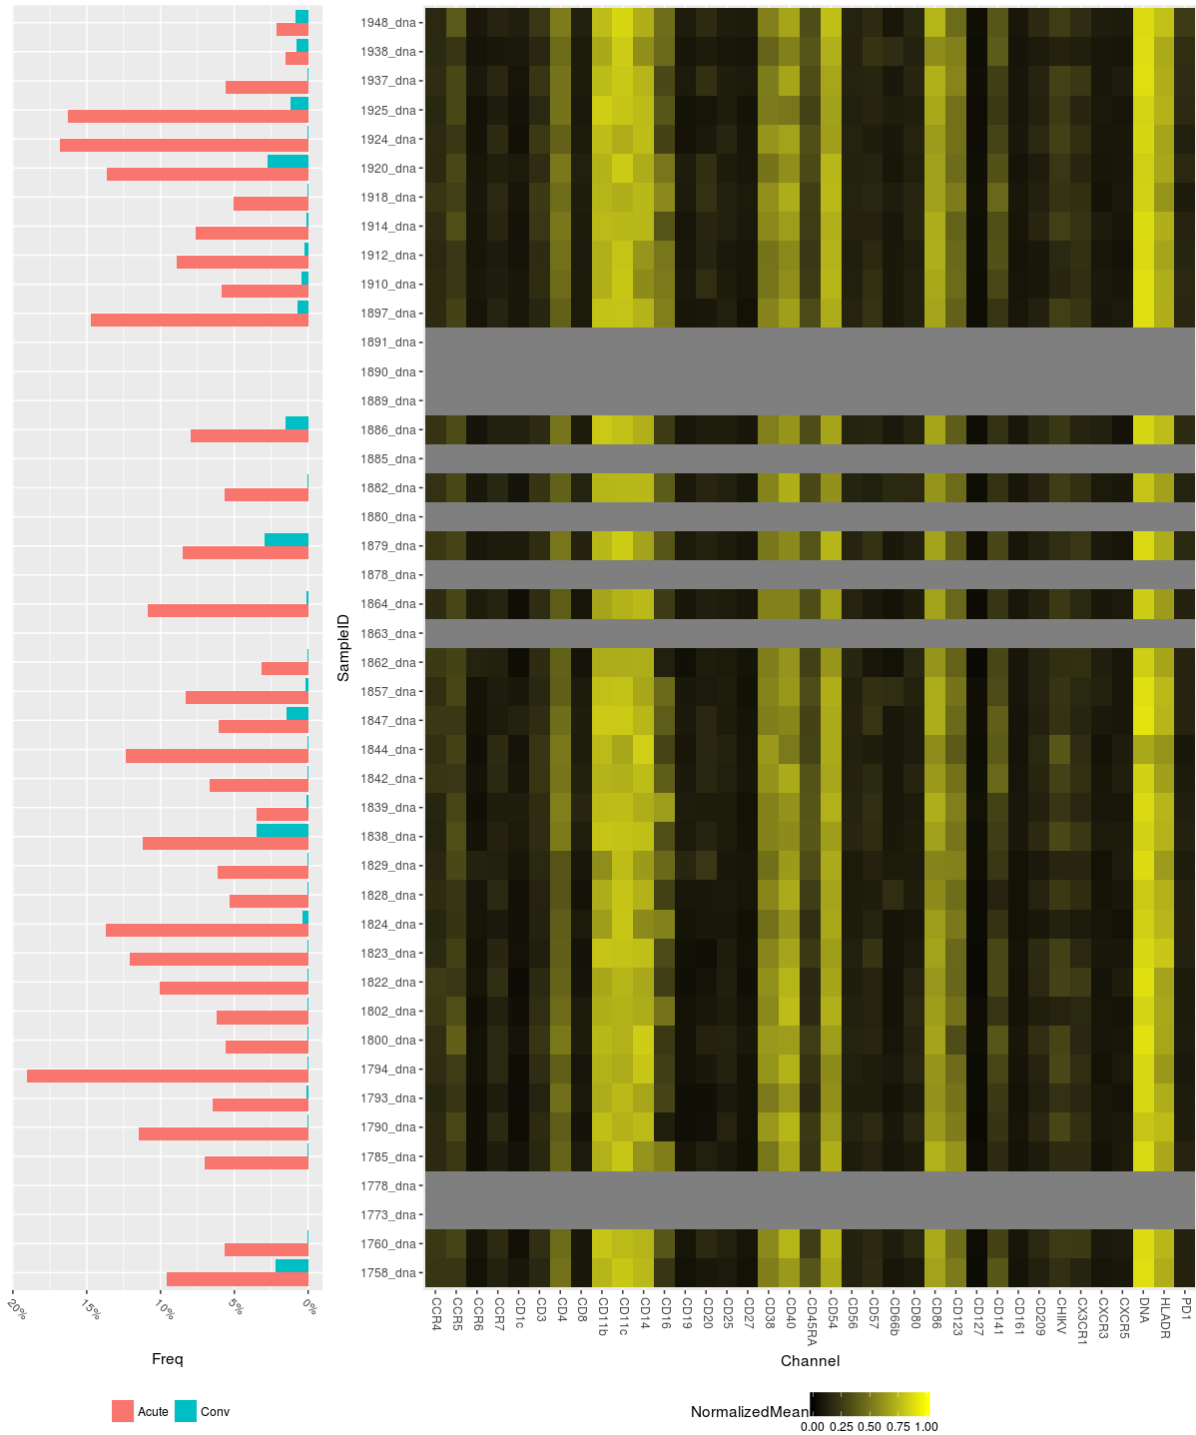

114

115 **Appendix Figure S6.**

116 Summary of population frequencies (per timepoint) and mean channel values for sub-

117 community 2 of CD14<sup>+</sup>CD16<sup>+</sup> monocytes, across all samples. Layout as in Appendix Figure S5.

118

**CD14<sup>+</sup> monocytes**

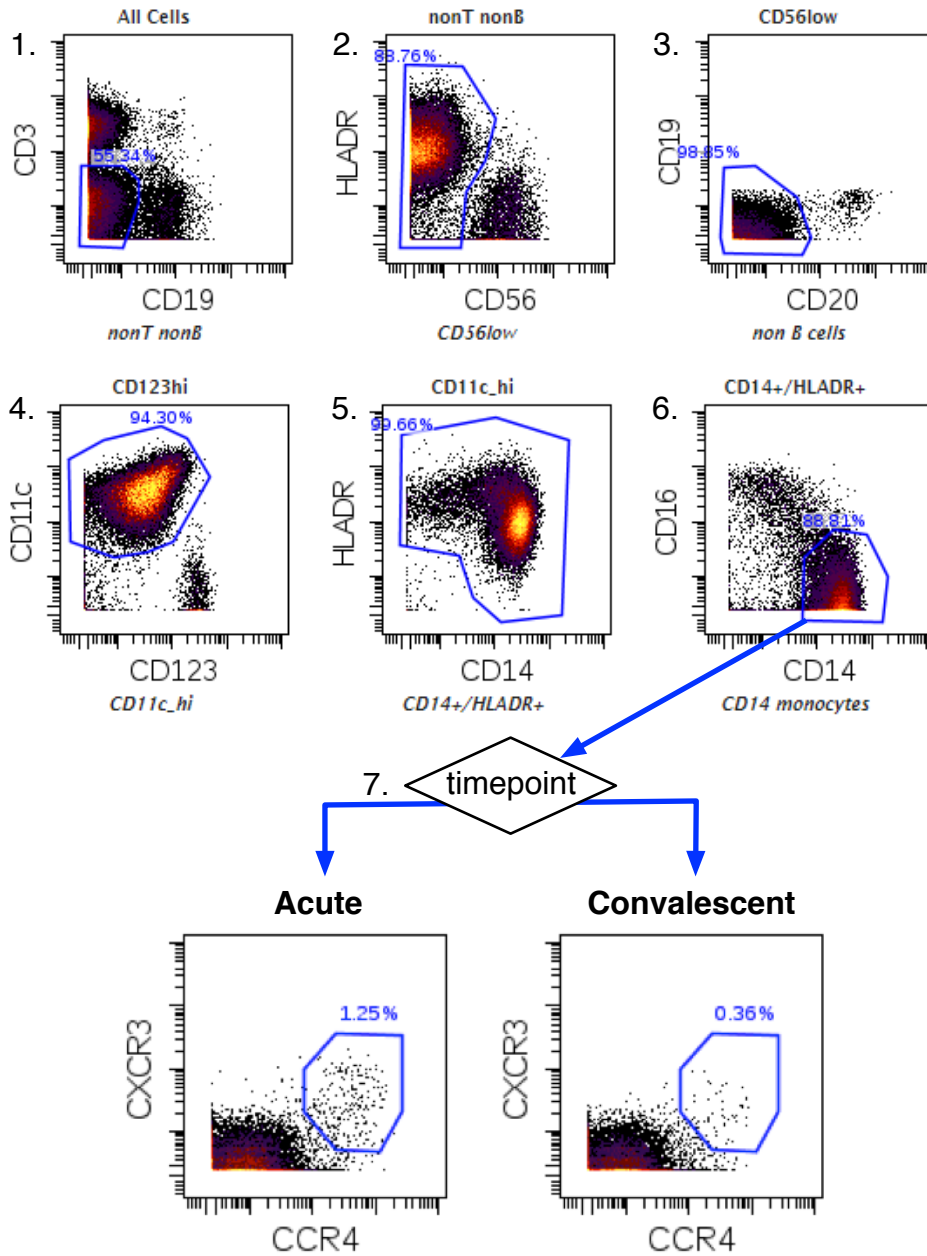

119

120 **Appendix Figure S7.**

121 Manual gating analysis of a representative sample demonstrates the presence of a small but

122 distinct CD14<sup>+</sup> monocyte subpopulation that displays non-canonical markers CXCR3 and

123 CCR4, among others (see sub-community 3 in Appendix Figure S8).

124

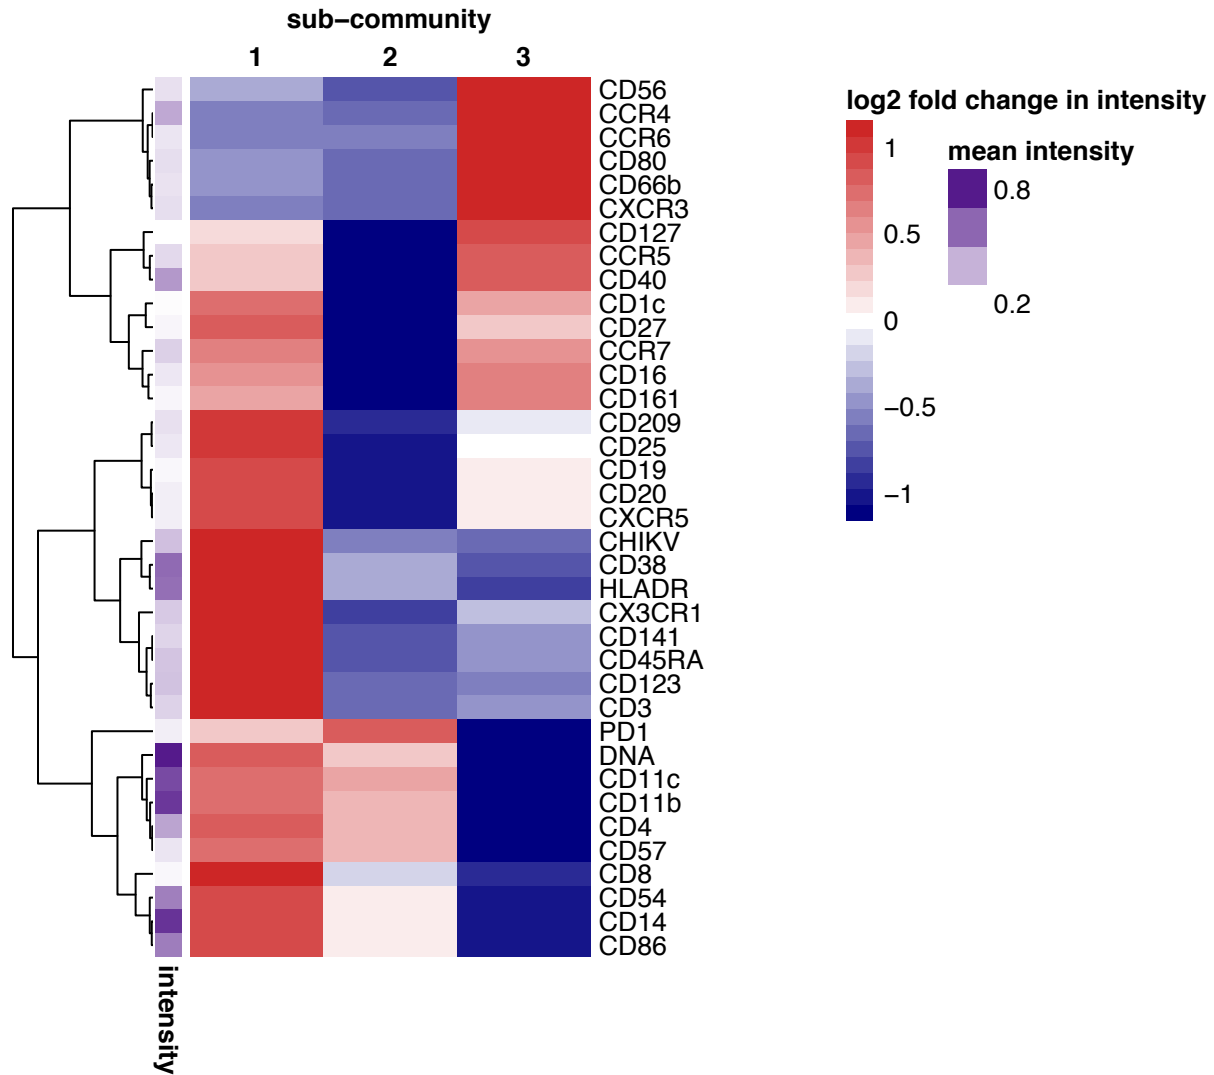

125

126 **Appendix Figure S8.**

127 Heatmap of differences in marker protein expression between three CD14<sup>+</sup> sub-communities  
 128 identified by MetaHybridLouvain. All channels listed here showed differences significant at FDR  
 129 < 0.05 (moderated paired t-test under the mixed-effects model). The patterns of fold change  
 130 differences in channel intensities between sub-communities are ordered vertically with  
 131 hierarchical clustering (red indicates increased relative to the other sub-communities). The  
 132 mean intensity of each channel across *all* sub-communities is shown by the adjacent purple  
 133 annotation column.

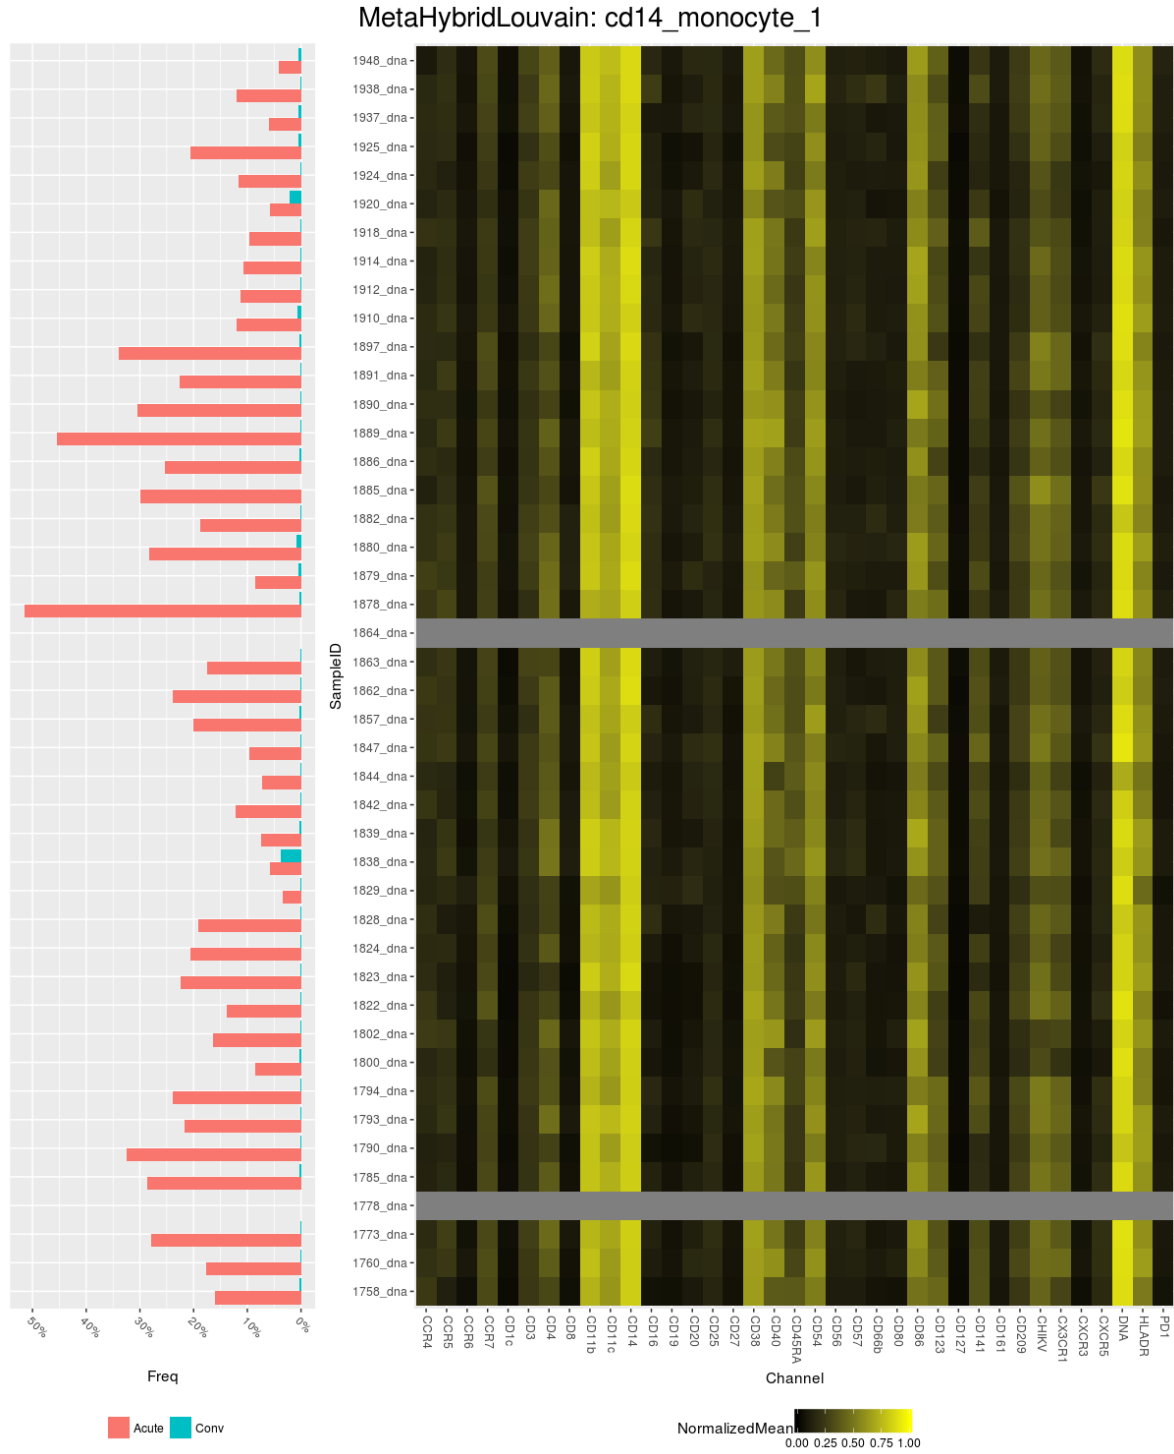

134

135 **Appendix Figure S9.**

136 Summary of population frequencies (per timepoint) and mean channel values for sub-  
 137 community 1 of CD14<sup>+</sup> monocytes, across all samples. Layout as in Appendix Figure S5.

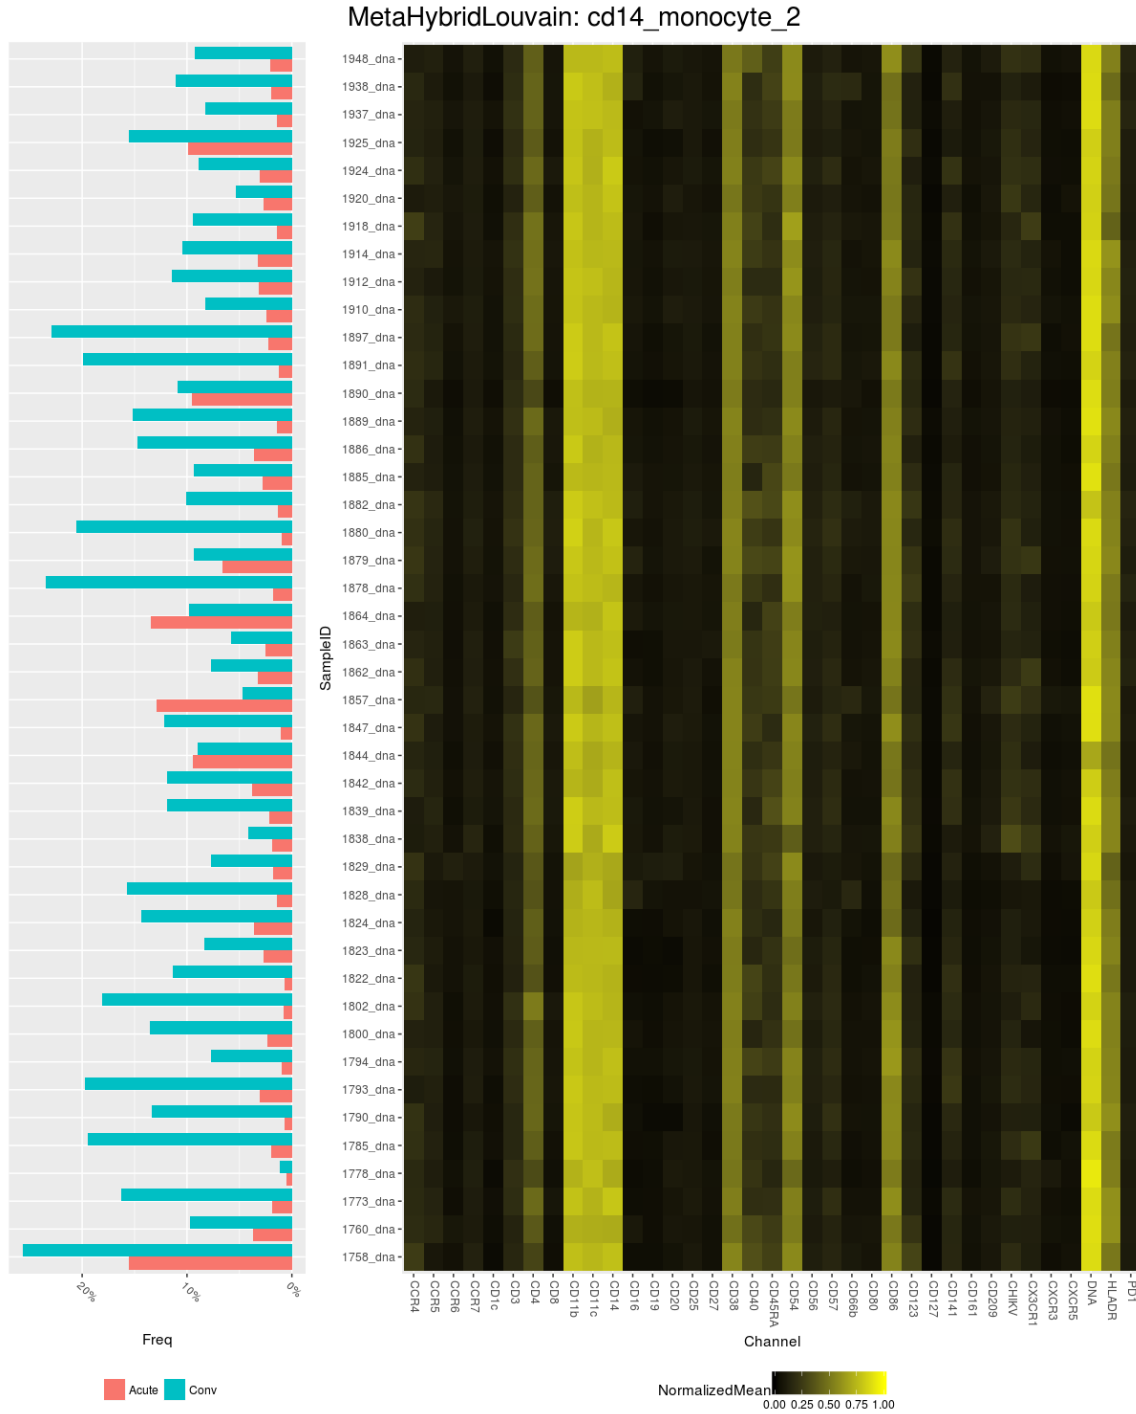

138

139 **Appendix Figure S10.**

140 Summary of population frequencies (per timepoint) and mean channel values for sub-  
 141 community 2 of CD14<sup>+</sup> monocytes, across all samples. Layout as in Appendix Figure S5.

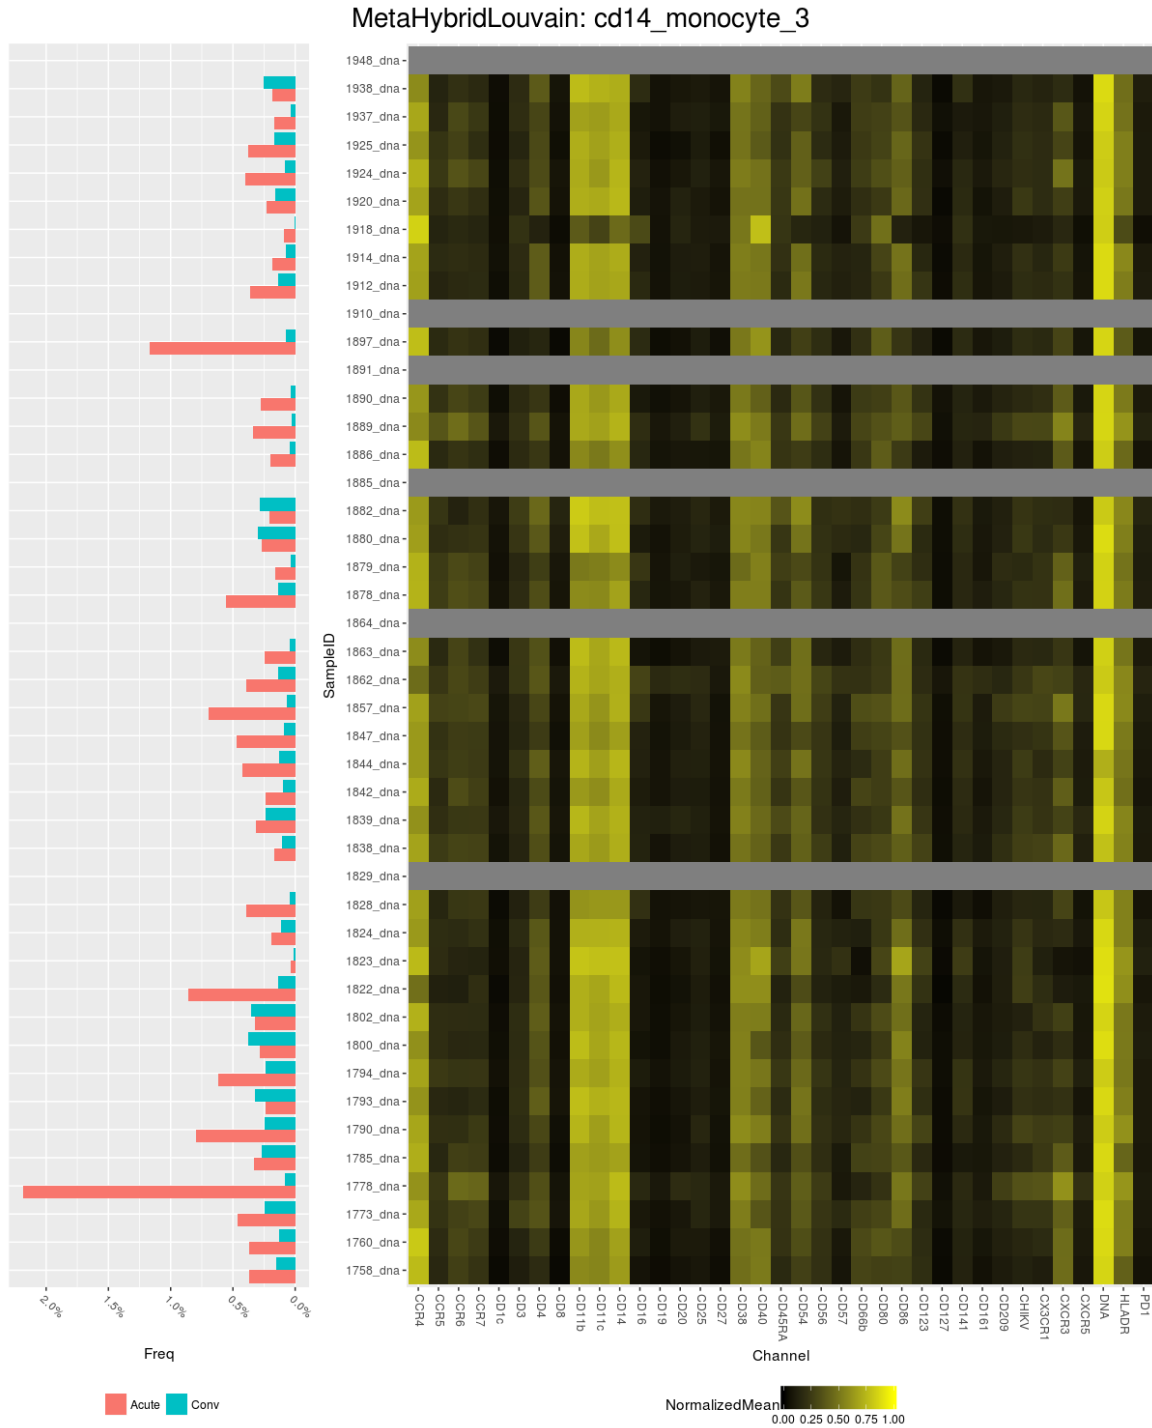

142

143 **Appendix Figure S11.**

144 Summary of population frequencies (per timepoint) and mean channel values for sub-

145 community 3 of CD14<sup>+</sup> monocytes, across all samples. Layout as in Appendix Figure S5.

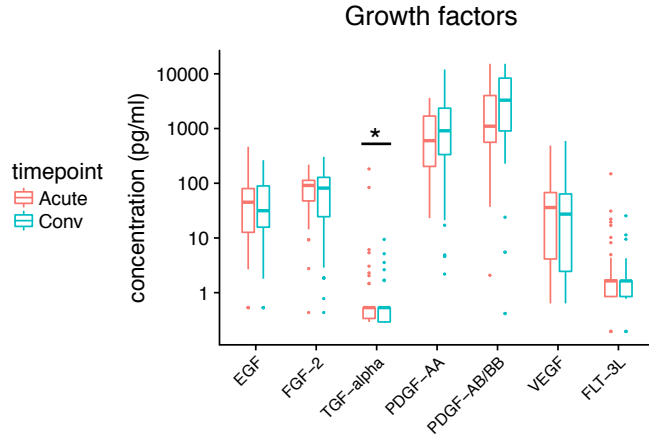

146

147 **Appendix Figure S12.**

148 Differences in serum growth factor levels between the acute and convalescent timepoints, as  
 149 measured by multiplex ELISA (Luminex). Only one of the differences depicted here achieved  
 150 statistical significance at FDR < 0.05, indicated by the asterisk.



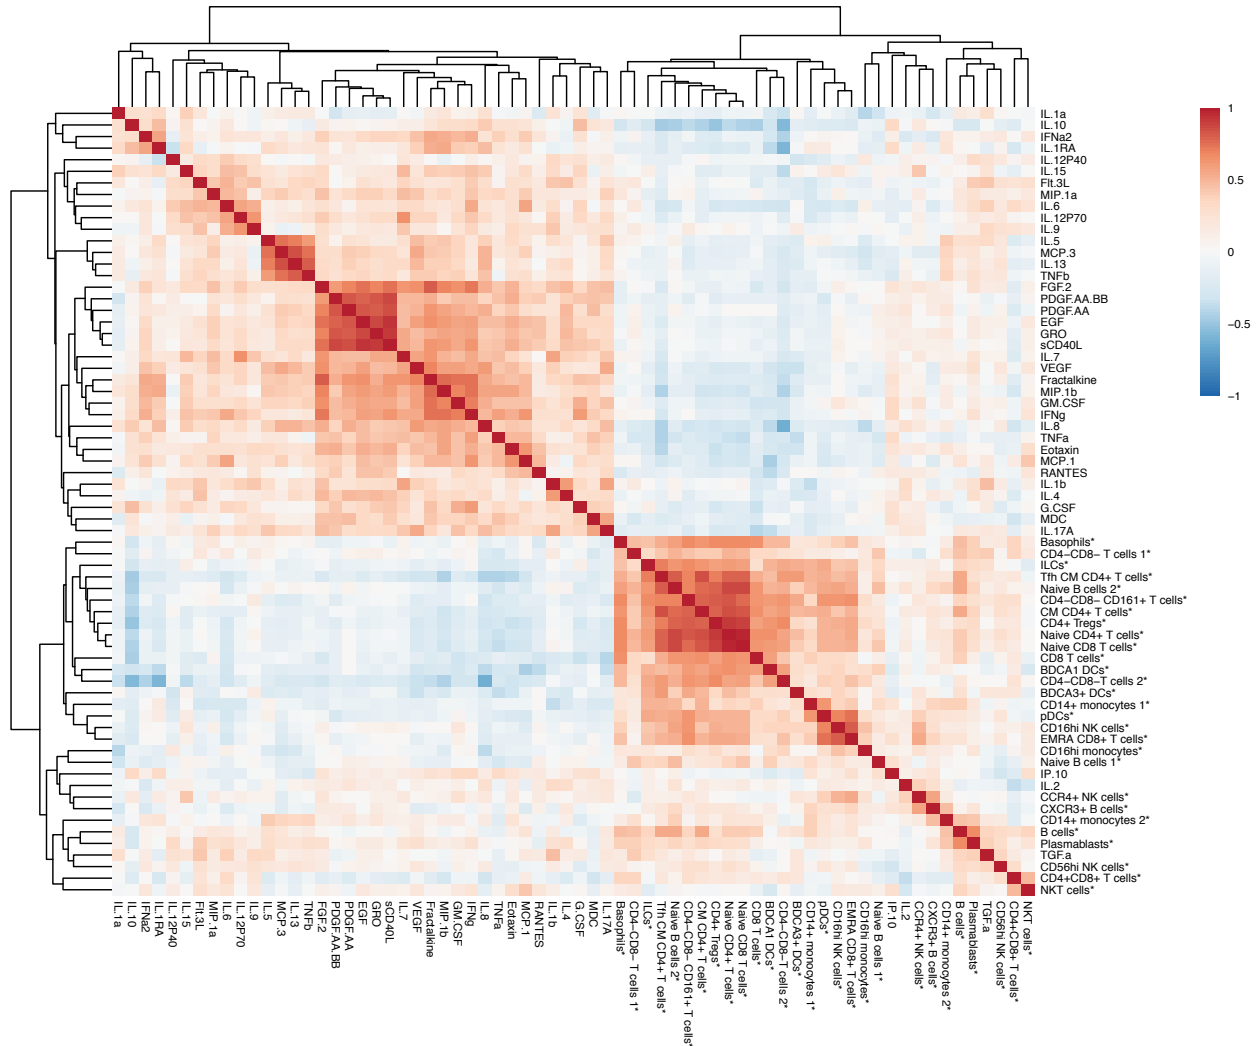

151

152 **Appendix Figure S13.**

153 Clustered heatmap of Spearman correlations between log-scaled serum cytokine concentration  
 154 (Luminex) and log-scaled cell subphenotype frequencies (CyTOF) of changes from the acute to  
 155 convalescent timepoints. CyTOF values are indicated by an asterisk following the label.

156

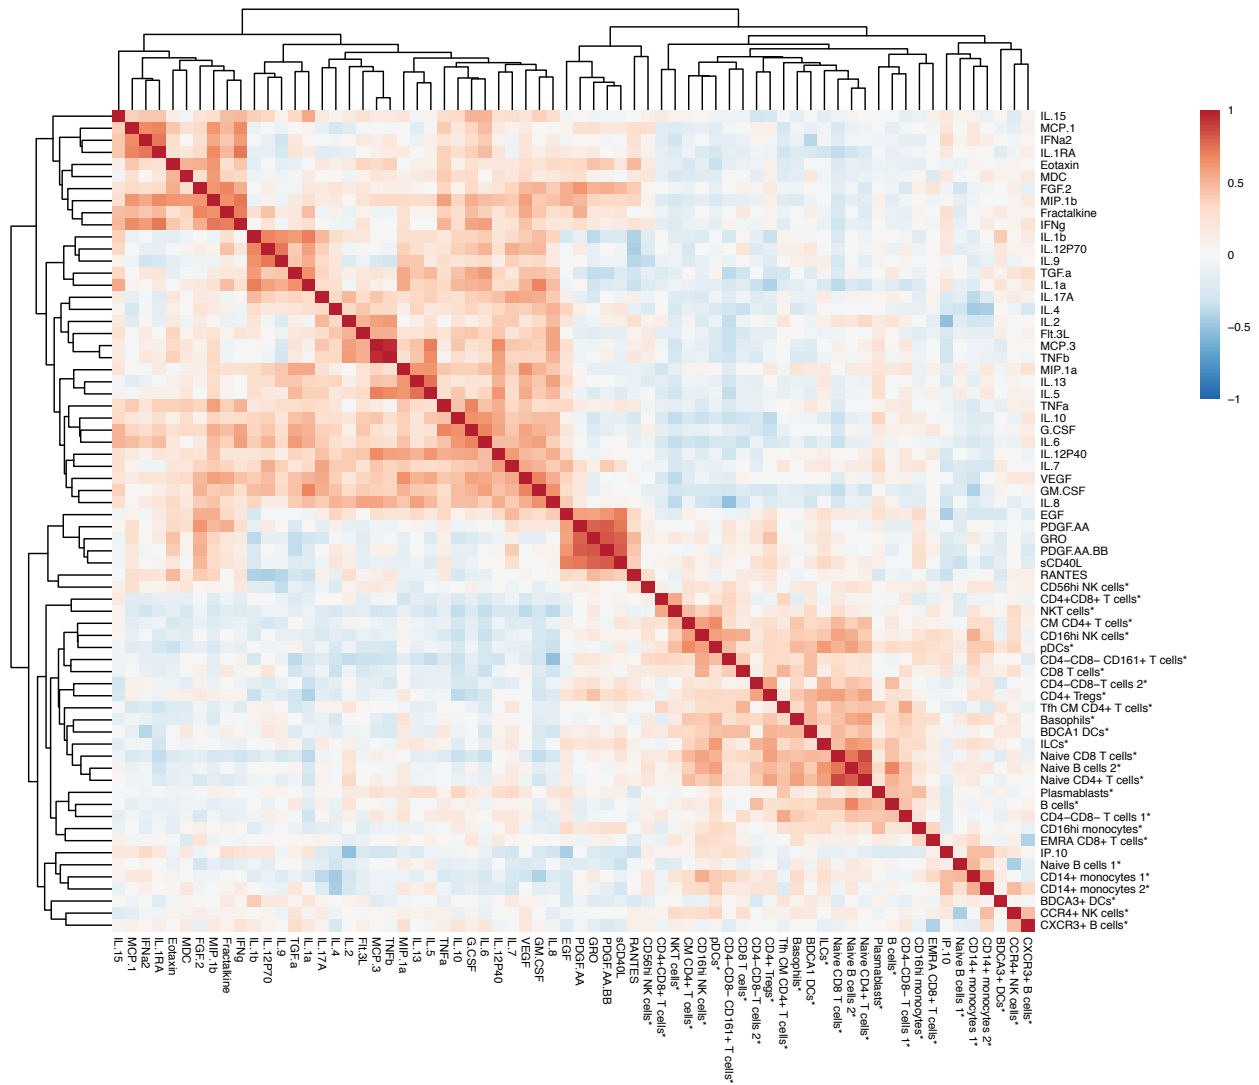

157

158 **Appendix Figure S14.**

159 Clustered heatmap of Spearman correlations between log-scaled serum cytokine concentration

160 (Luminex) and log-scaled cell subphenotype frequencies (CyTOF) *within the acute timepoint.*

161 CyTOF values are indicated by an asterisk following the label.

162

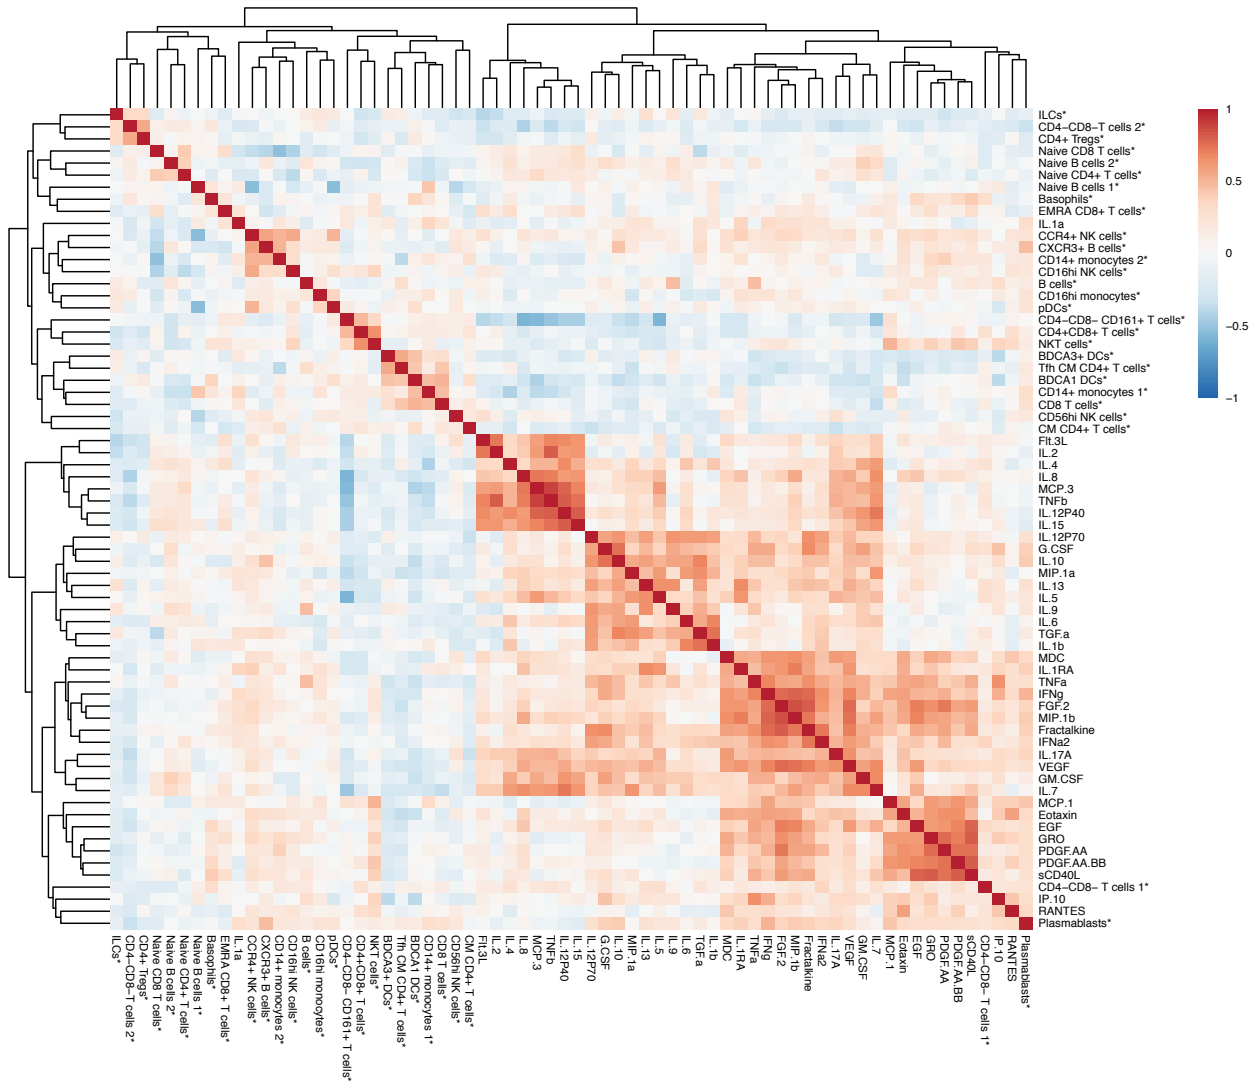

163

164 **Appendix Figure S15.**

165 Clustered heatmap of Spearman correlations between log-scaled serum cytokine concentration  
 166 (Luminex) and log-scaled cell subphenotype frequencies (CyTOF) *within the convalescent*  
 167 *timepoint*. CyTOF values are indicated with an asterisk following the label.

168

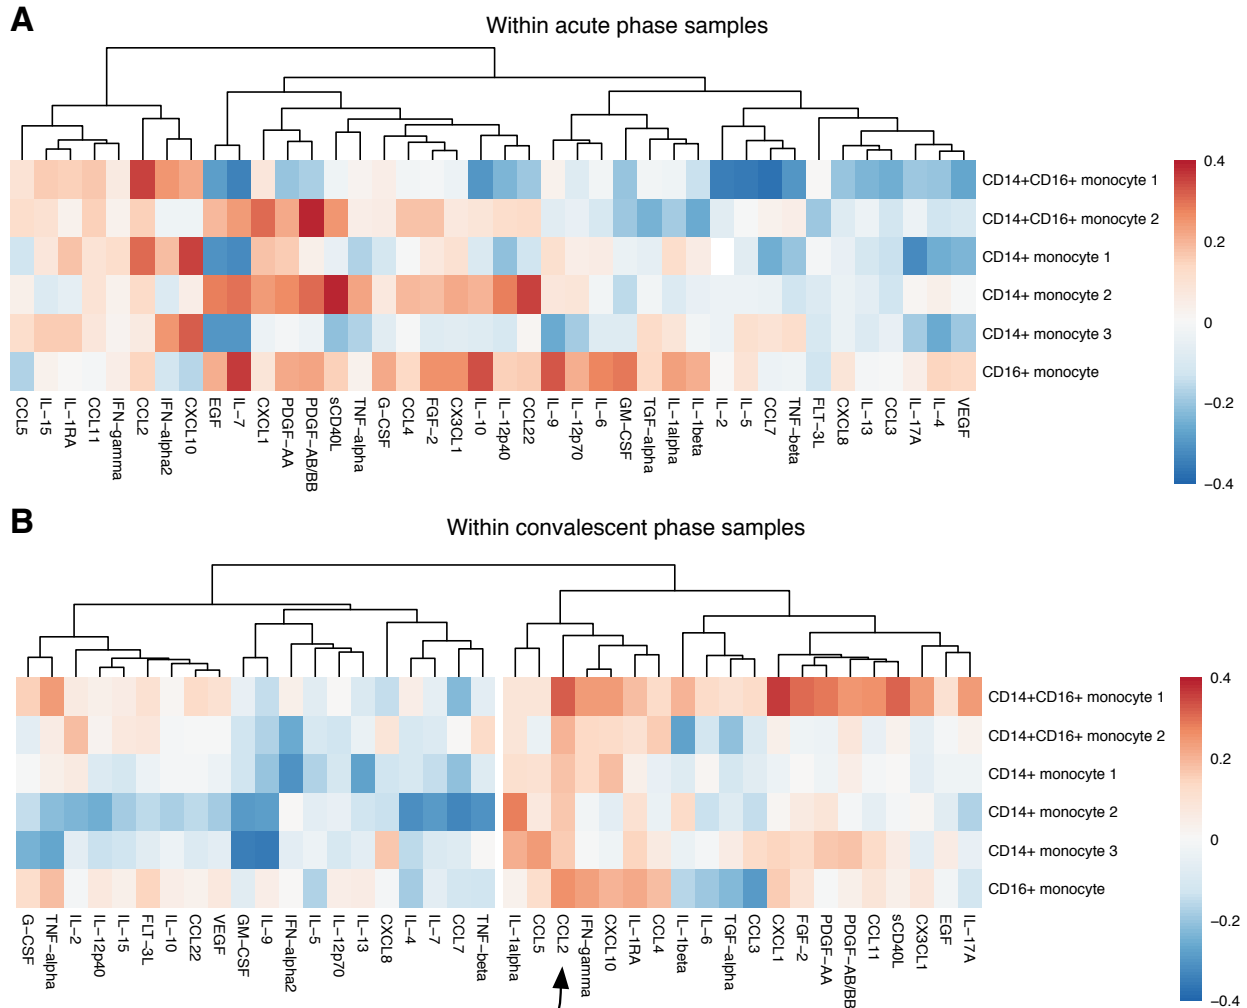

169

170 **Appendix Figure S16.**

171 Clustered heatmap of Spearman correlations between log-scaled serum cytokine concentration  
 172 and log-scaled monocyte subphenotype frequencies. *A*, within *acute*-phase samples. *B*, within  
 173 *convalescent*-phase samples. CCL2 within the convalescent timepoint (highlighted) displayed  
 174 the only set of Spearman correlations that differed significantly from those of the other cytokines  
 175 at an FDR threshold of < 0.05 (Mann-Whitney *U* test).

176



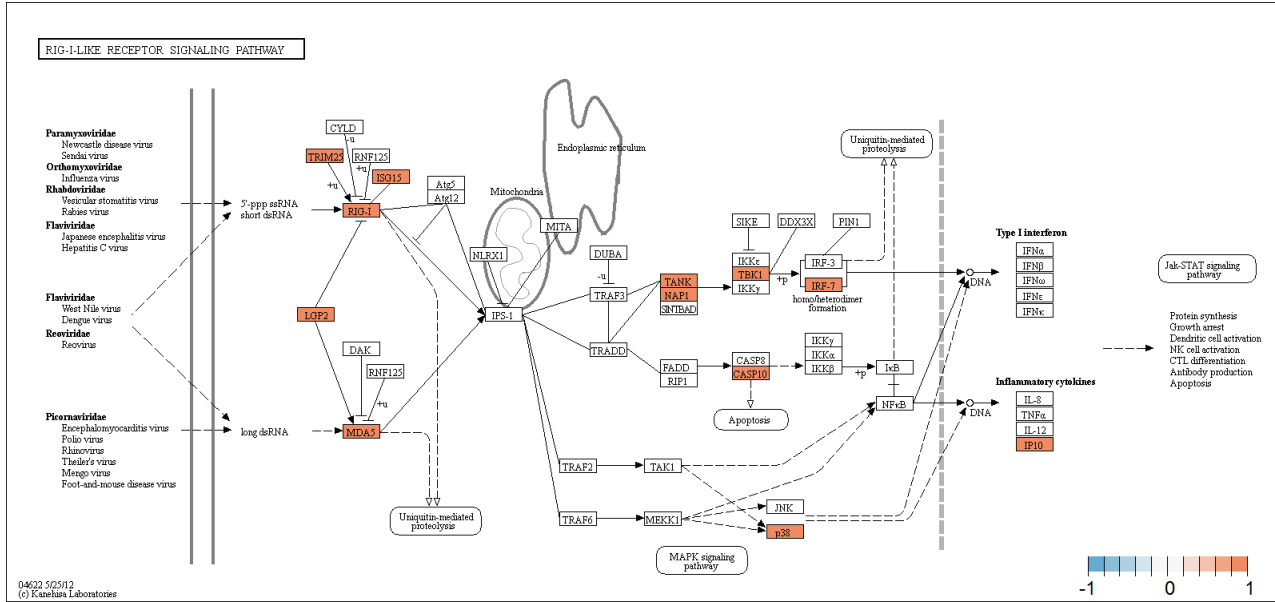

183

184 **Appendix Figure S18.**

185 Pathview plot of log<sub>2</sub> fold change in gene expression between acute and convalescent

186 timepoints for the RIG-I-like receptor signaling pathway in KEGG (accession hsa04622).

187 Positive values indicate upregulation during the acute phase of infection.

188

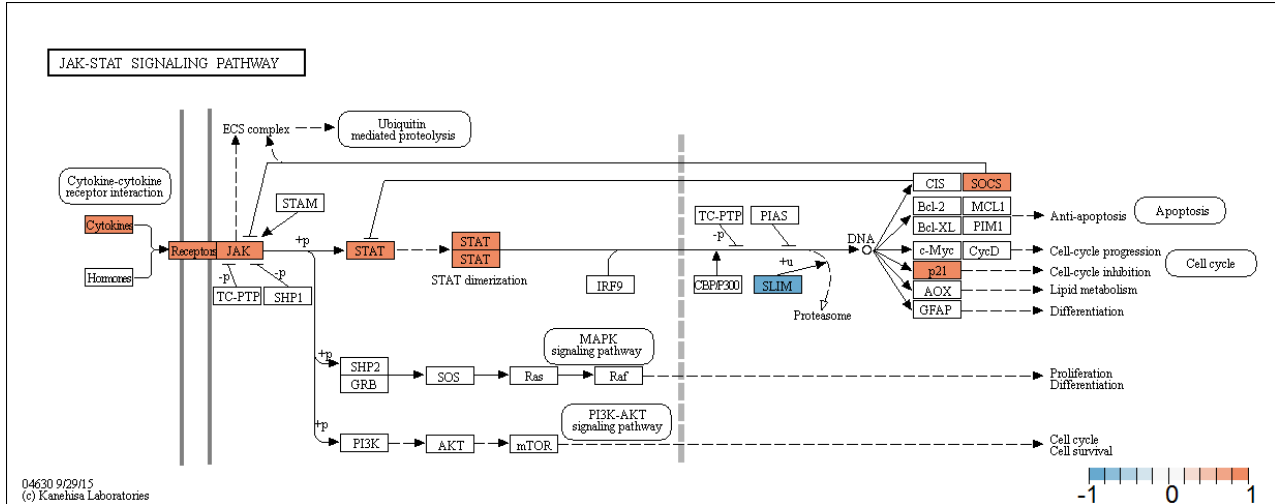

189

190 **Appendix Figure S19.**

191 Pathview plot of log<sub>2</sub> fold change in gene expression between acute and convalescent  
 192 timepoints for the JAK-STAT signaling pathway in KEGG (accession hsa04630). Positive  
 193 values indicate upregulation during the acute phase of infection.

194

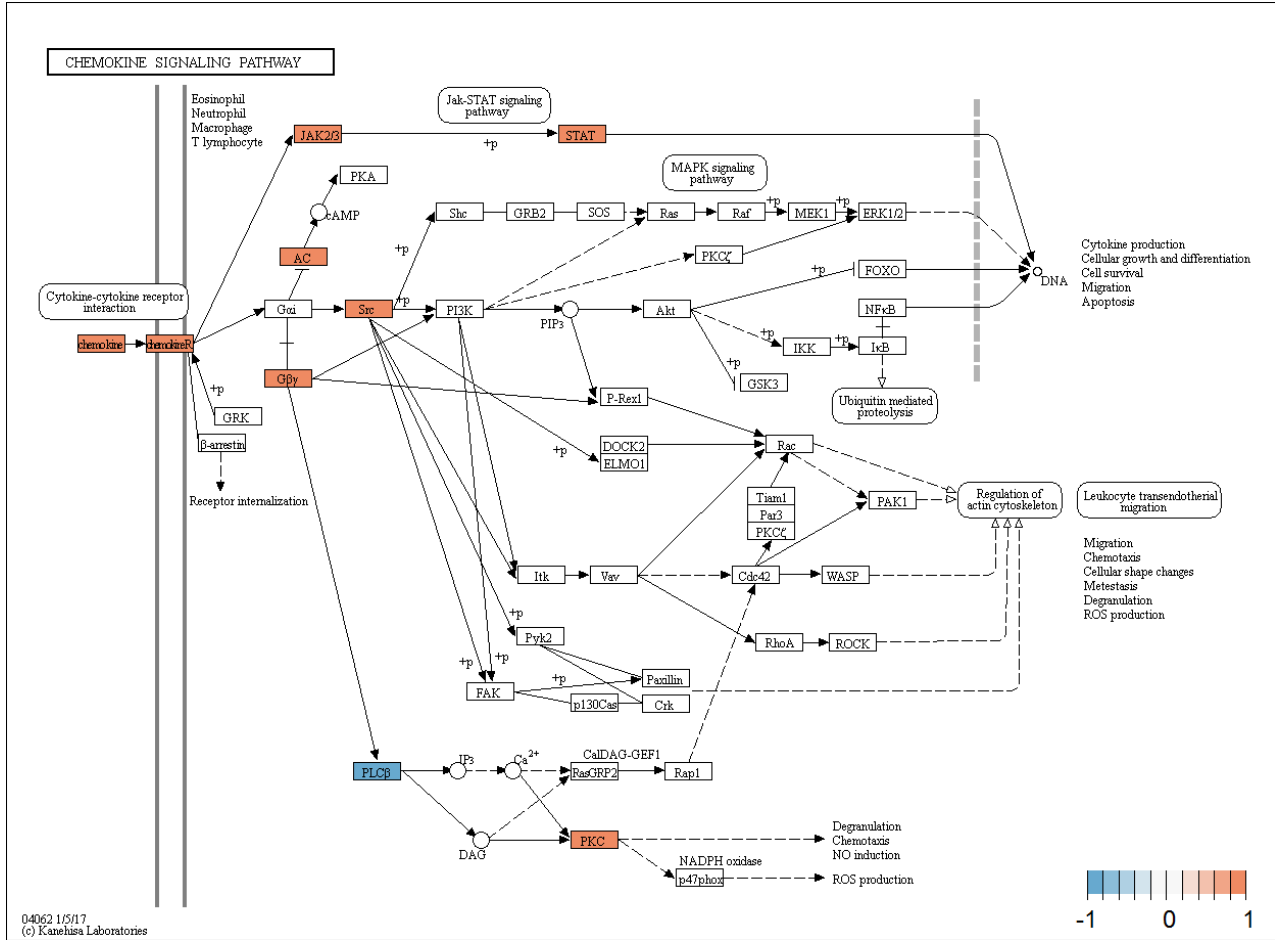

195

196 **Appendix Figure S20.**

197 Pathview plot of log<sub>2</sub> fold change in gene expression between acute and convalescent

198 timepoints for the chemokine signaling pathway in KEGG (accession hsa04062). Positive values

199 indicate upregulation during the acute phase of infection.

200



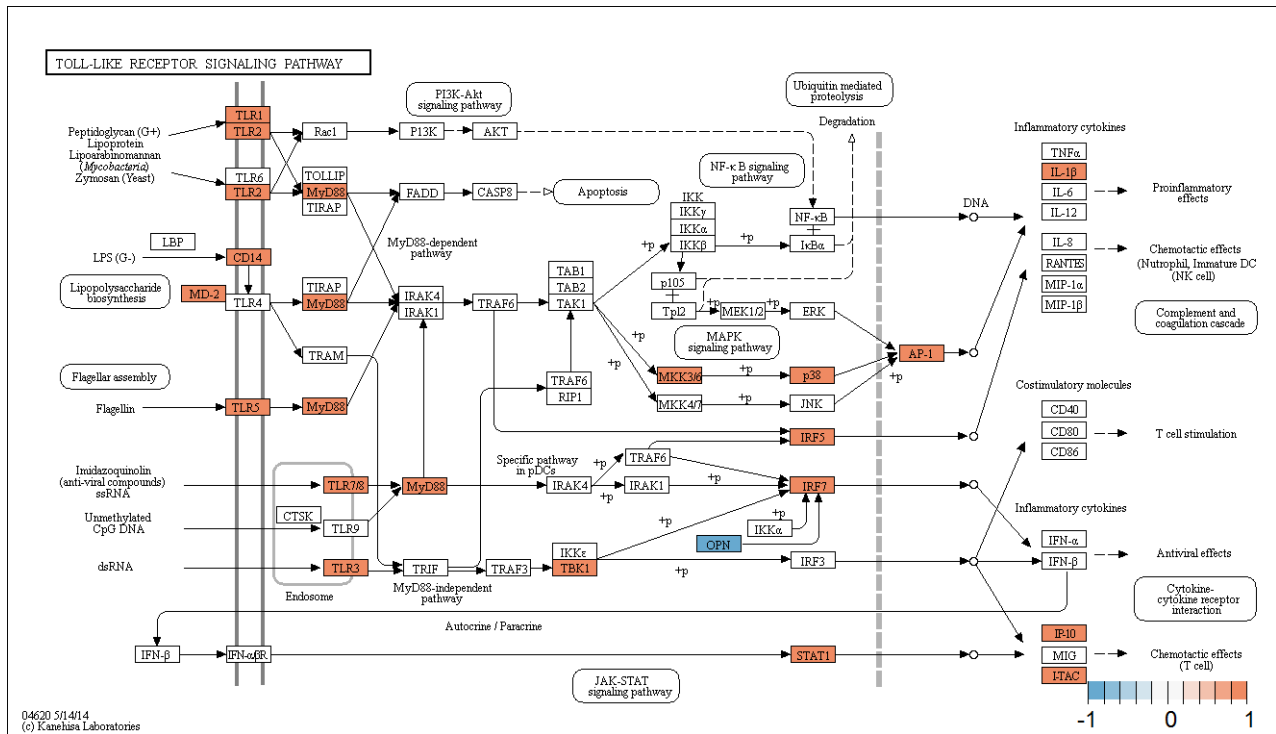

201

202 **Appendix Figure S21.**

203 Pathview plot of log<sub>2</sub> fold change in gene expression between acute and convalescent  
 204 timepoints for the toll-like receptor pathway in KEGG (accession hsa04620). Positive values  
 205 indicate upregulation during the acute phase of infection.

206

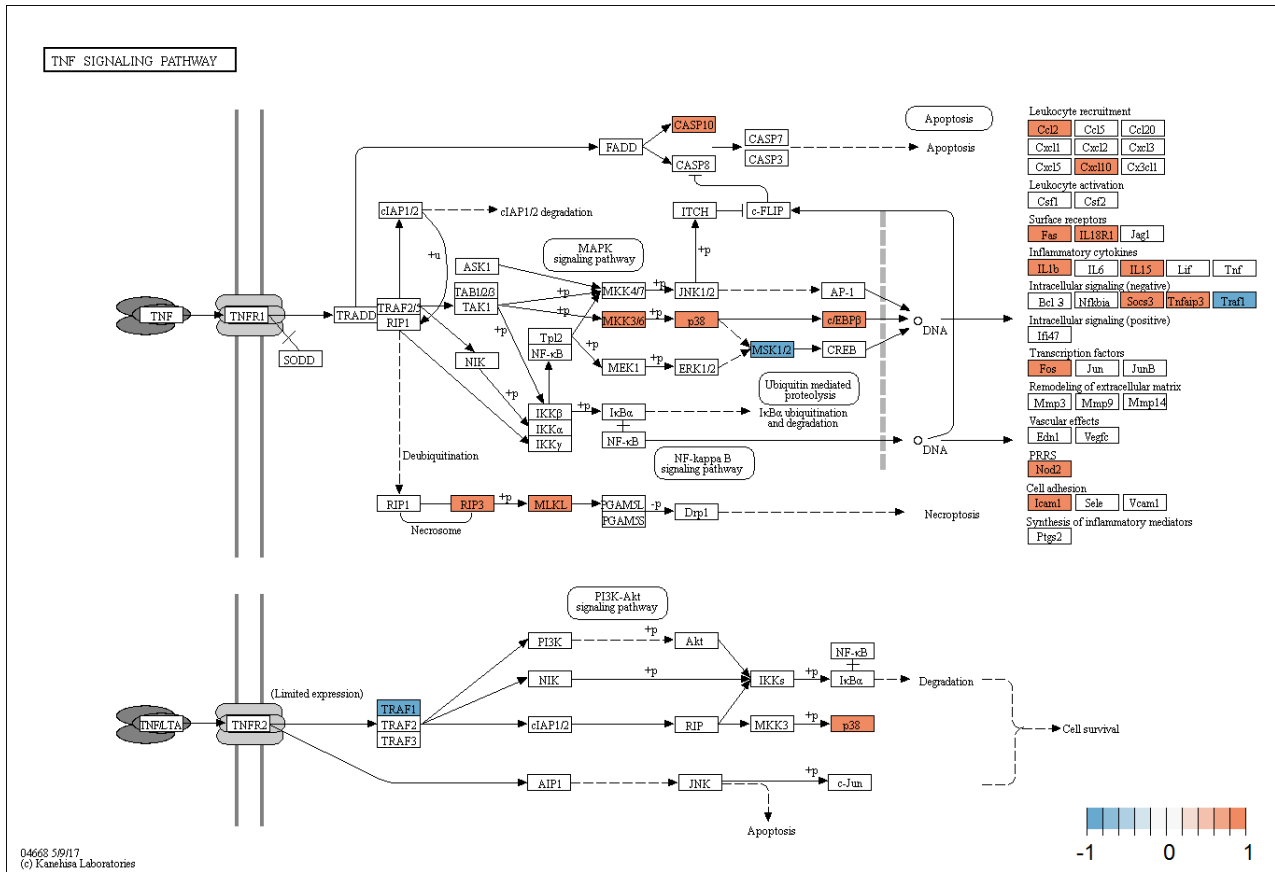

207

208 **Appendix Figure S22.**

209 Pathview plot of log<sub>2</sub> fold change in gene expression between acute and convalescent  
 210 timepoints for the TNF signaling pathway in KEGG (accession hsa04668). Positive values  
 211 indicate upregulation during the acute phase of infection.

212



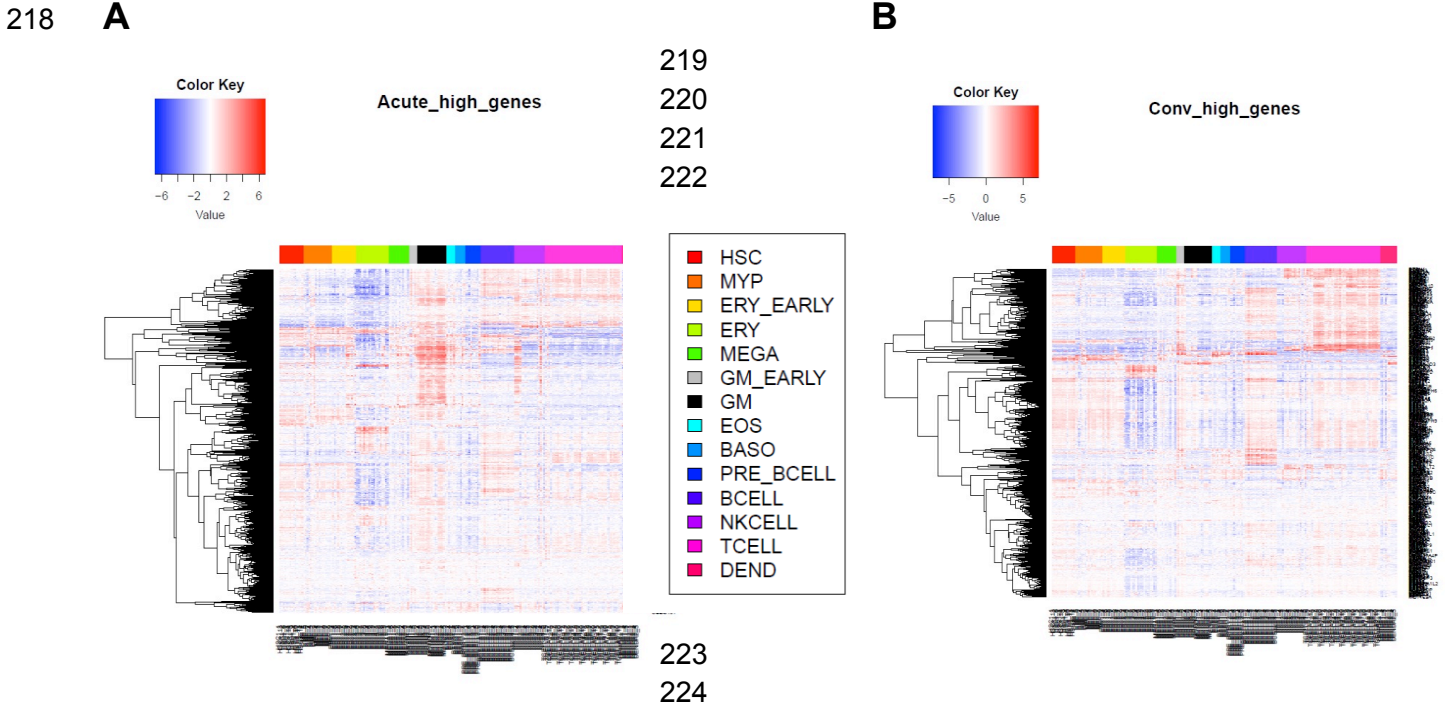

225

226 **Appendix Figure S24.**

227 Heatmap of gene expression across different types of blood cell lines for genes expressed  
 228 higher in acute phase (A) or higher in convalescent phase (B). Rows represent genes. Columns  
 229 represent blood cell lines which are grouped according to the lineage (column legend). HSC,  
 230 Hematopoietic stem cell; MYP, Myeloid progenitor; ERY, Erythroid cell; MEGA, Megakaryocyte;  
 231 GM, Granulocyte/monocyte; EOS, Eosinophil, BASO, Basophil; DEND, Dendritic cell.

232  
233

**A**

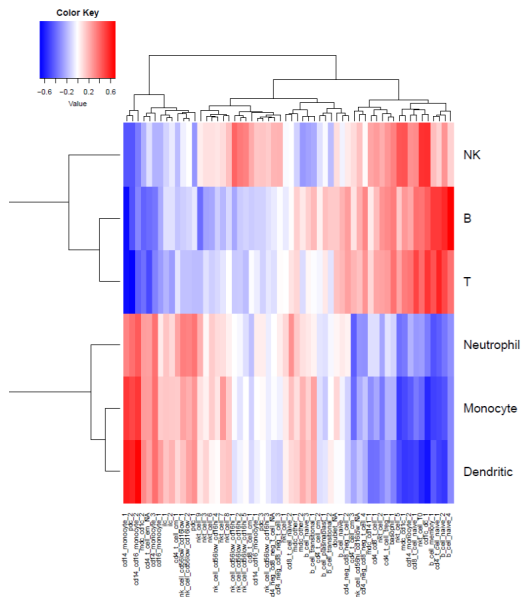

**B**

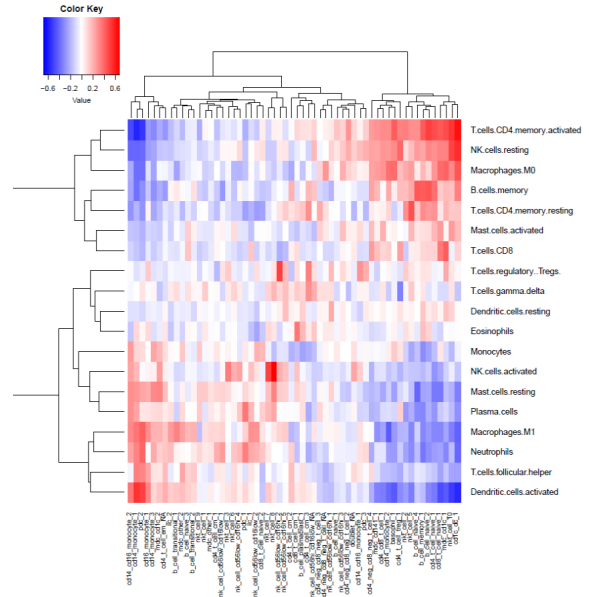

234 **Appendix Figure S25.**

235 Correlation between cell frequency derived from CyTOF and that estimated from gene  
236 expression using expression of cell-specific markers (A) or the CIBERSORT algorithm (B).  
237

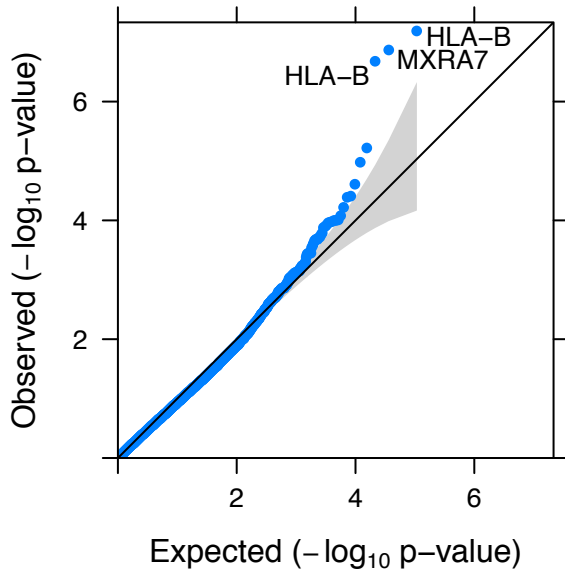

238

239 **Appendix Figure S26.**

240 Q-Q plot of the distribution of observed  $-\log_{10} P$  values for differentially expressed transcripts

241 between severe and non-severe cases against the distribution of  $-\log_{10} P$  values expected

242 under the null hypothesis (that no transcripts are differentially expressed). Gray shaded band

243 indicates the 95% confidence interval for the expected  $P$  value distribution under the null

244 hypothesis.

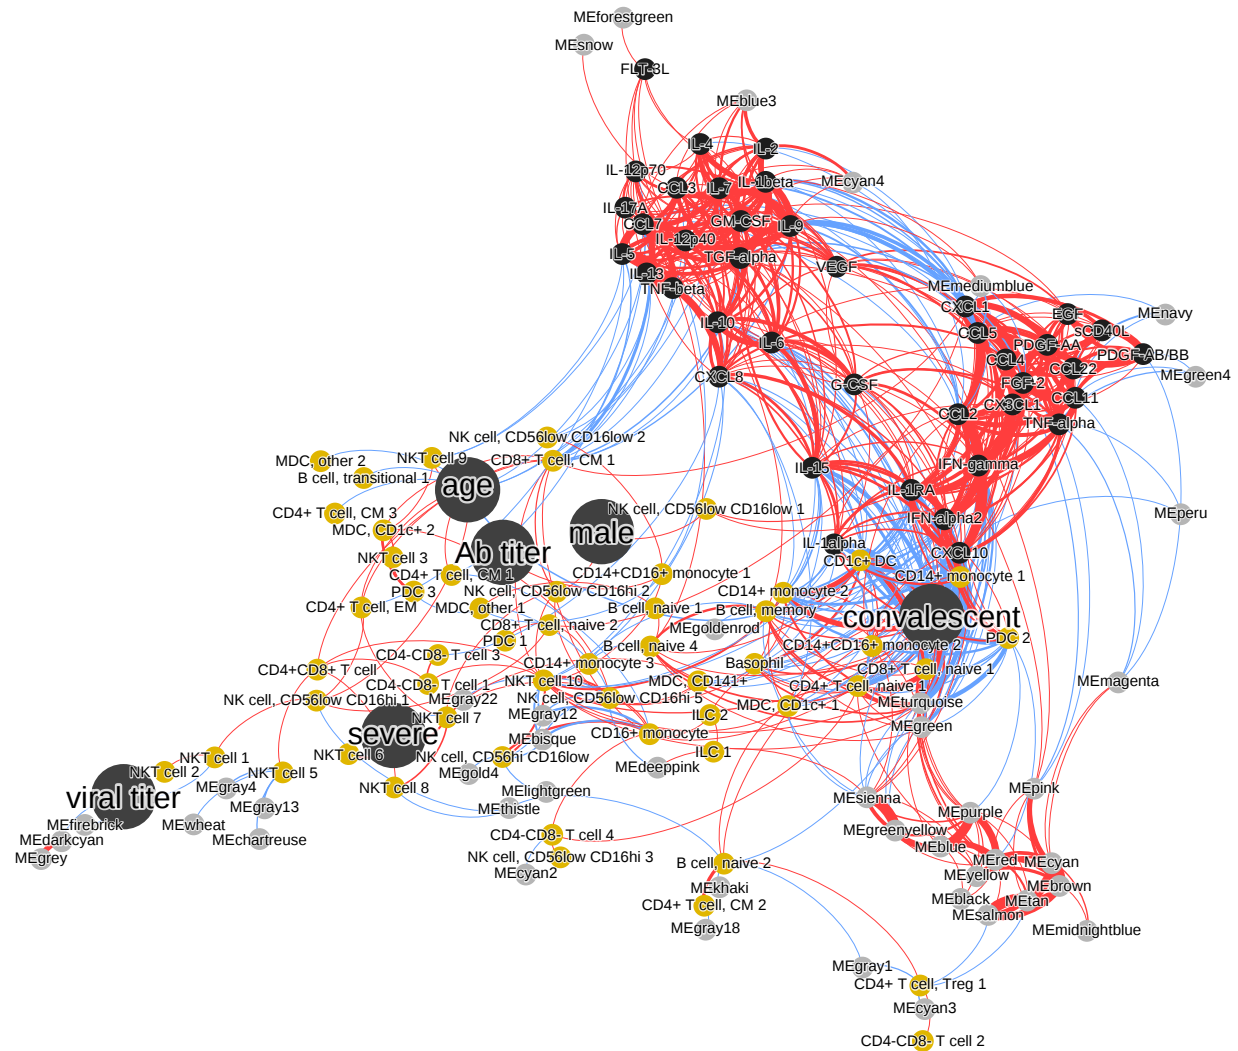

245

246 **Appendix Figure S27.**

247 Weighted multiscale interaction network depicting all Pearson's correlations between  
 248 subpopulation frequencies (gold nodes), serum cytokine concentrations (small black nodes),  
 249 coexpression modules (ME prefix, gray nodes), and clinical variables (large black nodes).  
 250 Serum cytokine concentrations cluster into two highly interconnected components (upper right),  
 251 farther from the clinical variables than the other node types. Edges are filtered to correlations  
 252 significant at  $P < 0.001$ , and thickness is scaled to the magnitude of the correlation.

253

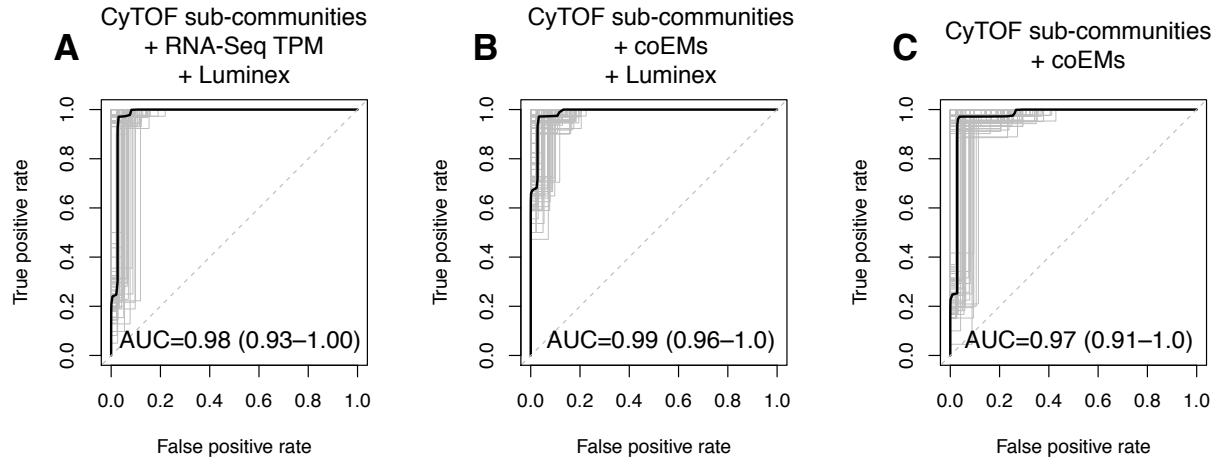

254

255 **Appendix Figure S28.**

256 Receiver operator characteristic (ROC) curves measuring the performance of elastic net logistic  
 257 regression models predicting the phase of infection (acute vs. convalescent) for each sample,  
 258 using progressively dimensionality-reduced versions of the dataset. Thin grey lines show the  
 259 ROC curves for 100 bootstrap replicates. The area under the curve (AUC) along with its 95%  
 260 confidence interval are shown underneath each plot; a perfect classifier would achieve AUC=1  
 261 while a random classifier is expected to achieve AUC=0.5 (dashed diagonal line). *A*, model  
 262 trained using all CyTOF sub-community frequencies, all quantified RNA-seq transcripts, and all  
 263 Luminex cytokine measurements achieves near-perfect performance. *B*, model trained as in *A*  
 264 but with eigengene values for 92 coexpression modules replacing the RNA-seq transcript-level  
 265 quantification; performance is still near-perfect. *C*, model trained as in *B* but without the Luminex  
 266 cytokine measurements; performance is still essentially equivalent to the other two models.

267



268 **A**

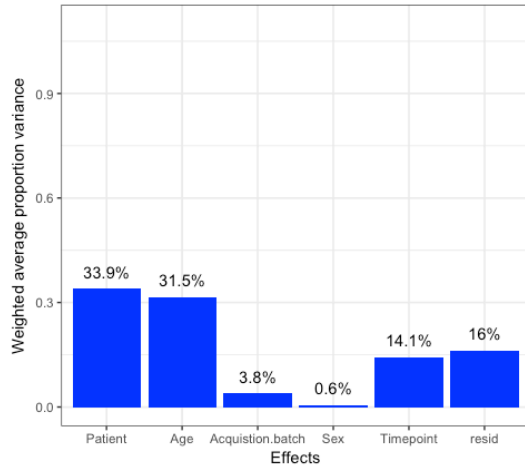

**B**

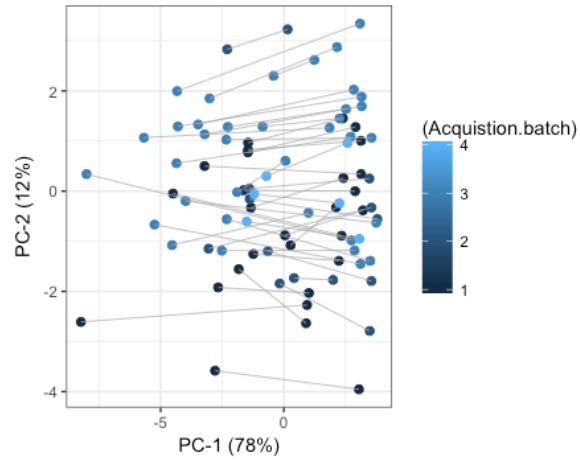

269

270 **Appendix Figure S29.**

271 Principal variance component analysis of CyTOF data for evaluation of potential batch effect.

272 Since the 3 potential batch effect variables were largely collinear (Spearman correlation > 0.93

273 for thaw, staining and acquisition batch variables), we included only the acquisition date in our

274 PVCA analysis. *A*, Barplot of contributions for each variable to overall variance. Acquisition date

275 explains 3.8% of the overall variance. *B*, Scatterplot of all samples in principal component space

276 for the first two principal components. Acquisition date is used to color the samples, and grey

277 lines connect pairs of samples across the two timepoints. As expected, the first principal

278 component (explaining 78% of the overall variance) roughly parallels the timepoint contrast,

279 while the acquisition date variable does not correlate with either of the first two principal

280 components.

281

**A**

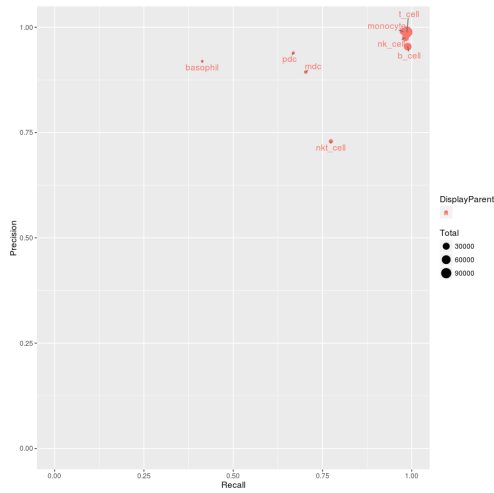

**B**

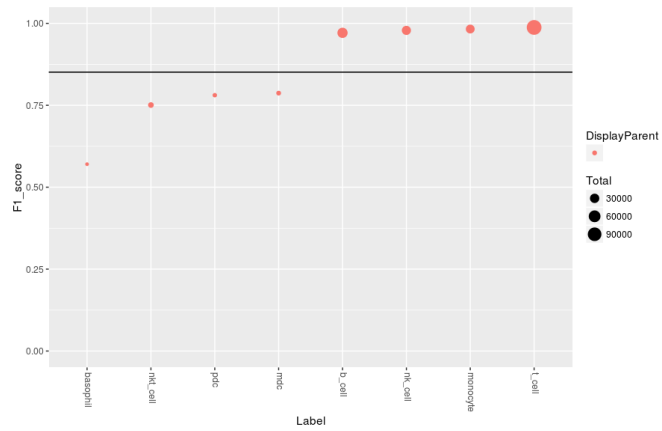

282

283 **Appendix Figure S30.**

284 High precision, recall scores and F1 score show that the classifier is returning accurate results  
 285 with low false negative rates. *A*, Precision versus recall for each cell subset. The NOD classifier  
 286 was trained over all samples except one, then applied to the remaining sample. This process  
 287 was repeated for all samples ("jackknifing"). For each cell subset, precision (TP / TP + FP) and  
 288 recall (TP / TP + FN) values were calculated, and the mean over all samples is presented here.  
 289 *B*, The classifier is an accurate classifier as shown by high F1 score values for all large cell  
 290 subsets. The F1 score for each cell subset is shown. The F1 score was calculated as the  
 291 harmonic mean of precision and recall ( $2 \times \text{precision} \times \text{recall} / (\text{precision} + \text{recall})$ ). The line  
 292 denotes the mean F1 score over all subsets. TP, true positive; FP, false positive; FN, false  
 293 negative.
