# Supplementary material for: Comprehensive innate immune profiling of chikungunya virus infection in pediatric cases
Source: PubMed Central journal article supplement (PMC6110311; doi:10.15252/msb.20177862), 2018-08-27
Supplement: MSB-14-e7862-s011.pdf [file MSB-14-e7862-s011.pdf]

## Comprehensive innate immune profiling of chikungunya virus infection in pediatric cases

Daniela Michlmayr, Theodore R. Pak, Adeeb H. Rahman, El-Ad David Amir, Eun-Young Kim, Seunghee Kim-Schulze, Maria Suprun, Michael G. Stewart, Guajira P. Thomas, Angel Balmaseda, Li Wang, Jun Zhu, Mayte Suarez-Fariñas, Steven M. Wolinsky, Andrew Kasarskis and Eva Harris.

---

### Review timeline:

|                     |                                |
|---------------------|--------------------------------|
| Submission date:    | 3 <sup>rd</sup> July 2017      |
| Editorial Decision: | 13 <sup>th</sup> November 2017 |
| Revision received:  | 9 <sup>th</sup> February 2018  |
| Editorial Decision: | 3 <sup>rd</sup> May 2018       |
| Revision received:  | 31 <sup>st</sup> May 2018      |
| Accepted:           | 29 <sup>th</sup> June 2018     |

---

Editor: Thomas Lemberger

### Transaction Report:

(Note: With the exception of the correction of typographical or spelling errors that could be a source of ambiguity, letters and reports are not edited. The original formatting of letters and referee reports may not be reflected in this compilation.)

1st Editorial Decision

13<sup>th</sup> November 2017

---

Thank you again for submitting your work to Molecular Systems Biology. I greatly apologize again for the very slow process which was due to difficulties in finding available reviewers and obtaining their reports. We have now finally heard back from the two referees who agreed to evaluate your manuscript. As you will see from the reports below, the referees find the topic of your study of potential interest. They raise, however, substantial concerns on your work, which should be convincingly addressed in a revision of this work. The constructive suggestions made by the reviewers are very clear in this regard. The issue related to potential batch effects, to the statistical analyses are particularly relevant.

Reviewer #2 also indicated the very serious efforts should be undertaken to clarify the main text and highlight better the biology.

The datasets reported in this study should be deposited in appropriate repositories (see <http://msb.embopress.org/authorguide#datadeposition>) and the relevant accession numbers or link listed in a Data and Software Availability section placed after Materials & Methods and that follows the model below:

,

# Data and software availability

The datasets and computer code produced in this study are available in the following databases:

- RNA-Seq data: Gene Expression Omnibus GSE46843  
[<https://www.ncbi.nlm.nih.gov/geo/query/acc.cgi?acc=GSE46843>]
- Chip-Seq data: Gene Expression Omnibus GSE46748

[<https://www.ncbi.nlm.nih.gov/geo/query/acc.cgi?acc=GSE46748>]  
- Protein interaction AP-MS data: PRIDE PXD000208  
[<http://www.ebi.ac.uk/pride/archive/projects/PXD000208>]  
- Imaging dataset: Image Data Resource doi:10.17867/10000101  
[<http://doi.org/10.17867/10000101>]  
- Modeling computer scripts: GitHub  
[<https://github.com/SysBioChalmers/GECKO/releases/tag/v1.0>]  
- [data type]: [full name of the resource] [accession number/identifier] ([doi or URL or identifiers.org/DATABASE:ACCESSION])

If you feel you can satisfactorily deal with these points and those listed by the referees, you may wish to submit a revised version of your manuscript.

-----  
REFREE REPORTS.

Reviewer #1:

The manuscript by Michlmayr et al is a descriptive study to understand infection and immunity of chikungunya virus infection in pediatric patients. The study involved multiple high throughput approaches from high density mass cytometry, RNASeq to multiplex cytokine measurements from 42 children naturally infected with the virus. The study showed that during early infection, monocyte subsets are the main populations involved in early response. The study is technically strong. However, the study remains solely observational and results validates earlier publications from CD14+ monocytes and macrophages to the immune mediators signature.

Specific comments:

1. Have the authors used another anti-CHIKV antibody targeting the non-structural proteins to indicate active replication?
2. What about the comparison in children who are non-viremic? How do the subsets appear? This will be an interesting comparison as children typically clear viremia faster than in adults.
3. The CyToF data provided a wealth of information and the study will benefit if the authors could draw some association with chronic/longterm outcomes of these patients.

Reviewer #2:

Michlmayr et al. aimed to perform systematic exploration and profiling of the immune response to CHIKV by analyzing data from whole blood, PBMCs and serum of 42 pediatric cases in two time points post viral infections (acute and convalescence) by using three high multidimensional techniques of RNA-seq, CyTOF and Luminex, trying to unravel their linkage to dynamics of infection, the viral titer, the titer of anti -CHIKV virus and the clinical severity in the acute phase.

Comments:

1. The authors used CD45 based barcoding approach to pool paired samples of the same individual from two time points post infection in order minimize intra-individual potential batch effects.

Did the authors test for possible inter-individual batch effects for example as a result of different batch runs? Did they use analysis methods for batch effect removal?

2. The authors used logistic regression classifier with training data in which cell subsets were determined manually, to define major subsets in the remaining samples.

there are several concerns regarding the model assumptions:

Logistic regression requires each observation to be independent, however in the study cohort there is dependency between samples of the same individual that present different time points. In addition, the logistic regression model should have little or no multicollinearity, however some CyTOF markers may be expressed on the same cell type, therefore there might be dependency between the independent variables in the model.

- Did the authors test the logistic regression model performance?

- It is recommended to supply more details regarding the logistic regression model, at least in the supplementary regarding the markers that were included in the model and the relevant coefficients for the classification of each subset.

- The authors found several cell subsets that the CHIKV virus preferentially infect.

In the paper it was noted that one of the four sub-communities of naïve B cells also exhibits correlation with CHIKV E2 protein, but it would be good to supply more characteristic details regarding the unique marker distribution that distinguish this sub community from the other three subgroups.

5. The authors evaluate the clustering of samples according to several parameters (acute/convalescence phases, Ab titer, Viral titer, severity) by different sets of cell subset/sub-community frequency (Fig 2B, 3F) qualitatively.

In order to make quantitative estimation, external indices for cluster validity can be evaluated including entropy, purity, precision, recall or F-measure.

6. The authors did not find significant spearman correlation between CyTOF and luminex features.

a. this was followed by focused analysis of Pearson correlation between monocyte subpopulations and all cytokines. Why different correlation coefficients (Spearman Vs Pearson) were used?

b. More targeted search can be applied by looking for biological derived correlations between the cytokine and their paired receptors. In this way, it can be tested whether there is a correlation between CCL2 that was found to be highly correlated with the frequency of the monocytes subpopulations and its receptors CCR2 and CCR4.

c. Luminex analysis is often much better performed directly on MFI rather than on the concentrations - this may be something the authors can consider doing.

7. The authors found significant change in monocytes subsets using CyTOF, and a change in markers intensity that differentiate between the relevant sub-communities.

Do the relevant markers were also found to be differentially expressed in the GX data between time points? If such differences are also observed in the GX data, it might indicate that these changes were originated from the change in monocytes abundance.

8. Building a network which includes multiple data types one always runs into the issue that due to technical noise within assay results better correlate than across assays. There are multiple ways of dealing with this (e.g. different cutoffs, separate within data and across data calculations etc). Doing so may eliminate much technical based noise from data and highlight the more interesting signals. Similarly - give the authors identification of an interesting cell subset - perhaps a better approach would be to simply focus on what correlates with it.

9. Notably - gene expression data in whole blood greatly reflects cell composition, and it would be of interest to adjust the data for this.

10. I would suggest edits to the text to flesh out here the biology and compact the technical analyses, much of which should be moved to supp or Methods.

Minor comments:

- The statistical test in addition to FDR in parenthesis is not always included in the text i.e. Wilcoxon signed-rank test in line 213.

-Figure 7B: it is recommended to also add secondary y axis for q values (as shown in figure S26) or for total count of overlapping DETs, because the DET enrichment in specific module depends on the module size.

1st Revision - authors' response

9<sup>th</sup> February 2018

### Point-by-point response to reviewers

#### **MSB-17-7862: “Comprehensive innate immune profiling of chikungunya virus infection in pediatric cases”**

**Reviewer #1:** The manuscript by Michlmayr et al is a descriptive study to understand infection and immunity of chikungunya virus infection in pediatric patients. The study involved multiple high throughput approaches from high-density mass cytometry, RNA-seq to multiplex cytokine measurements from 42 children naturally infected with the virus. The study showed that during early infection, monocyte subsets are the main populations involved in early response. The study is technically strong. However, the study remains solely observational and results validate earlier publications from CD14+ monocytes and macrophages to the immune mediators signature.

Specific comments:

**1. Have the authors used another anti-CHIKV antibody targeting the non-structural proteins to indicate active replication?**

We thank the reviewer for this comment and we agree that definitive conclusions about viral replication of CHIKV cannot be drawn but unfortunately, for our study we only had access to the E antibody provided by our collaborator. Due to time constraints and urgency of the study we were not able to use an antibody for the non-structural protein of CHIKV. Hence, in our study we are only able to identify CHIKV E+ cells rather than infected cells. We believe we have made this important detail sufficiently clear in the manuscript (see line 245, page 10) and hope that we can address this issue in more detail in future experiments.

**2. What about the comparison in children who are non-viremic? How do the subsets appear? This will be an interesting comparison as children typically clear viremia faster than in adults.**

The reviewer raises a very intriguing question and we agree that the comparison between non-viremic and viremic children would be interesting. However, the focus of our study was to characterize the immune profile in CHIKV-infected children in the acute and convalescent phase of the

disease. In this context, one of the inclusion criteria of our study was to be CHIKV+ in blood at the acute phase of infection as measured by quantitative RT-PCR, resulting in the exclusion of non-viremic children. However, we have collected acute (viremic) and convalescent (non-viremic) samples of all children and compare these two time points in our study. Within the CyTOF dataset, we included the acute-phase viral titer level as a co-variant in our heatmaps of log<sub>10</sub>-scaled PBMC community frequencies for all samples and could not identify significant correlations between sub-community frequencies and log-transformed acute-phase viral titers at FDR<0.1 (Fig 2B and 3E).

**3. The CyTOF data provided a wealth of information and the study will benefit if the authors could draw some association with chronic/longterm outcomes of these patients.**

We agree with the reviewer that it would be highly informative and important for clinicians to correlate our datasets (CyTOF, Luminex and RNA-seq) with disease outcome. As part of our study design we collected blood samples 3, 6 and 12 months post infection and investigated any chronic or long-term effects of CHIKV in all patients. We found that none of the children in our study developed chronic arthralgia, pain and arthritis caused by CHIKV. For clarity, we have included this detail in our manuscript in the Results and Materials and Methods section (Line 162, page 7 and Line 778, page 32).

**Reviewer #2:** Michlmayr et al. aimed to perform systematic exploration and profiling of the immune response to CHIKV by analyzing data from whole blood, PBMCs and serum of 42 pediatric cases in two time points post viral infections (acute and convalescence) by using three high multidimensional techniques of RNA-seq, CyTOF and Luminex, trying to unravel their linkage to dynamics of infection, the viral titer, the titer of anti - CHIKV virus and the clinical severity in the acute phase.

Comments:

**1. The authors used CD45 based barcoding approach to pool paired samples of the same individual from two time points post infection in order minimize intra-individual potential batch effects. Did the authors test for possible inter-individual batch effects for example as a result of different batch runs? Did they use analysis methods for batch effect removal?**

We thank the reviewer for their attention to the CD45 barcoding approach and the well-placed concern about the possibility of other inter-individual batch effects that would not be controlled for by this approach. We tested for the possibility of batch effect in the final matrix of CyTOF subpopulation frequencies by looking at 3 different components: 1) acquisition, 2) staining and 3) thawing dates for each sample. Using the first principal component of the CyTOF data, which captures 78% of the variance, we evaluated the contribution of these 3 variables to the variance and found no association (all show  $P > 0.7$ ). To quantify how much variability in the data is explained by the batch variables, we used principal variance component analysis

(PVCA). Since the 3 potential sources of batch effect were largely collinear (Spearman correlation  $> 0.93$  for thaw, staining and acquisition batch variables), we included only the acquisition date in our PVCA analysis, which indicated that the batch explains 3.8% of the overall variance (see Figure below). This contribution is much lower than that of the “interesting” clinical variables—such as patient ID, patient age, and time point—which collectively contribute to 79.5% of the observed variance, or approximately the size of the first principal component. We believe this analysis justifies removing the “acquisition date” batch variable from downstream modeling, as the costs of increased model complexity (testing for interactions, compensating for unequal batch sizes, etc.) are unlikely to be outweighed by its minimal explanatory value. As the reviewer mentions, we did design the CyTOF experiments to minimize intra-individual potential batch effects by always pairing samples for the same individual into the same batch. Our PVCA analysis therefore indicates that inter-individual batch variability between multiple paired patient samples did not add substantially to unintended variance. In our revised manuscript, we explicitly include text in the Methods section at line 815, page 33 and in Supplemental Methods (Line 241, page 34) that summarizes the approach we used to quantify the contribution of batch effect to CyTOF data and the ensuing decision to drop the batch variable from further modeling, and added the above graphical summary as Supplemental Figure S29.

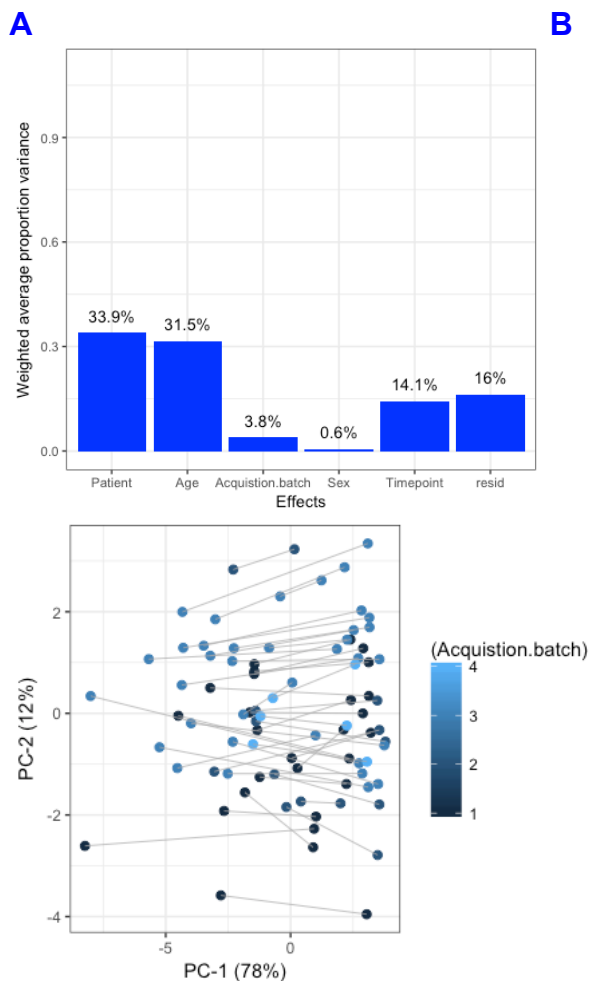

**Figure S29.** Principal variance component analysis of CyTOF data for evaluation of potential batch effect. *A*, Barplot of contributions for each variable to overall variance. Acquisition date explains 3.8% of the overall variance. *B*, Scatterplot of all samples in principal component space for the first two principal components. Acquisition date is used to color the samples, and grey lines connect pairs of samples across the two timepoints. As expected, the first principal component (explaining 78% of the overall variance) roughly parallels the timepoint contrast, while the acquisition date variable does not correlate with either of the first two principal components

**2. The authors used logistic regression classifier with training data in which cell subsets were determined manually, to define major subsets in the remaining samples.**

**there are several concerns regarding the model assumptions:**

**Logistic regression requires each observation to be independent, however in the study cohort there is dependency between samples of the same individual that present different time points.**

We thank the reviewer for their observations regarding our analysis approach. As the reviewer notes, the experimental design does indeed involve dependency between samples that came from the same individual. However, this dependency does not affect the logistic regression model, since the input for the NOD classifier is single events and their channel intensities, not samples. The classifier receives no sample-related features and does not make any sample-related predictions. For the purpose of the model, the events are independent of and unrelated to the sample structure.

**-In addition, the logistic regression model should have little or no multicollinearity, however some CyTOF markers may be expressed on the same cell type, therefore there might be dependency between the independent variables in the model.**

The reviewer is correct that there might be collinearity between the channel intensities in the data. This could lead to incorrect coefficient estimates, where the effect of a given channel will be overestimated while that of a correlated channel would be diminished. While this would pose a problem if we wanted an explanatory model where the coefficients are expected to provide some insight regarding the cell subsets we are predicting, this is actually not the case in this study; the goal of the model is simply prediction accuracy, not the explanatory power of the coefficients. As far as prediction accuracy is concerned, the model performs as expected.

**3. Did the authors test the logistic regression model performance?**

We did test the logistic model performance over the cell subsets, both by manually examining the prediction and using the F-measure (aka F1 score). Additionally, we tried using regularization (in order to address the collinearity issue raised above) and reached comparable results. These results are presented below and included in the revised manuscript in the Supplemental Methods section (Line 256, page 34) and as Supplemental Figure S30. In general, our logistic regression model shows acceptable performance for all cell subsets as measured by both precision/recall (Fig

S30A) and F1 score (Fig S30B), with larger subsets showing better performance due to the increased availability of training data.

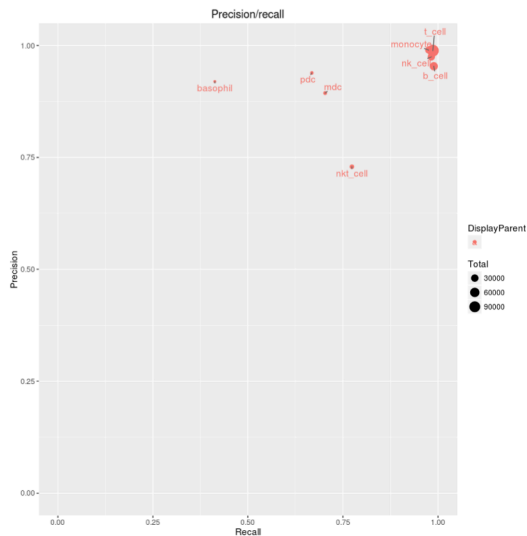

**Figure S30A. High precision and recall scores show that the classifier is returning accurate results with low false negative rates.** Precision versus recall scores are plotted for each cell subset. The NOD classifier was trained over all samples except one, then applied to the remaining sample. This process was repeated for all samples ("jackknifing"). For each cell subset, precision (TP / TP + FP) and recall (TP / TP + FN) values were calculated, and the mean over all samples is presented here. (TP= true positive, FP= false positive, FN=false negative)

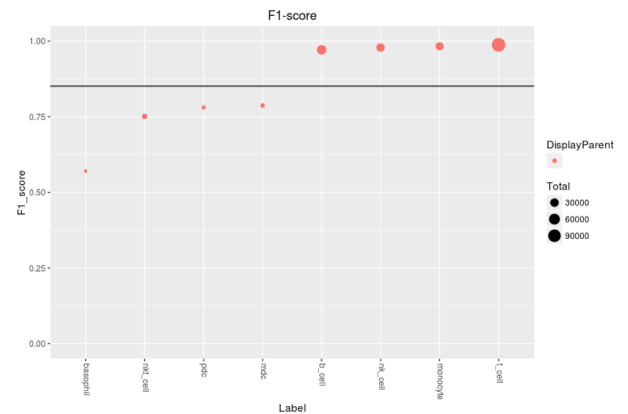

**Figure S30B. The classifier is an accurate classifier as shown by high F1 score values for all large cell subsets.** Shown is the F1 score for each cell subset. The F1 score was calculated as the harmonic mean of precision and recall ( $2 \times \text{precision} \times \text{recall} / (\text{precision} + \text{recall})$ ). The line denotes the mean F1 score over all subsets.

**-It is recommended to supply more details regarding the logistic regression model, at least in the supplementary regarding the markers that were included in the model and the relevant coefficients**

**for the classification of each subset.**

All of the surface marker channels were used for the classifier, and we have included a table of the relevant coefficients for the classification of each subset below and in the manuscript as Table S9. However, as discussed above, we believe that the importance of these coefficients is somewhat limited since the classifier aims to build a predictive model, not an explanatory model.

**Table S9.** Coefficients for the logistic regression model used for classification of the major cell subsets (NodLabel).

| channel | b_cell | basophil | mdc    | monocyte | nk_cell | nkt_cell | pdc    | t_cell |
|---------|--------|----------|--------|----------|---------|----------|--------|--------|
| CD57    | -0.116 | -0.413   | 0.011  | -0.471   | 0.353   | 0.217    | -0.415 | 0.383  |
| CD19    | 2.185  | 0.000    | -0.933 | -0.774   | -1.543  | -0.120   | -0.680 | -0.798 |
| CD45RA  | 0.444  | -1.009   | -0.041 | 0.181    | 0.176   | -0.098   | 0.205  | 0.107  |
| CD141   | -0.567 | -0.434   | 0.173  | 0.072    | -0.265  | -0.124   | 0.226  | 0.082  |
| CD4     | -0.541 | -1.087   | -0.382 | -0.100   | -0.077  | -0.091   | 1.010  | 0.105  |
| CD8     | -0.977 | -0.421   | -0.832 | -0.574   | -0.568  | 0.392    | -0.252 | 0.216  |
| CD20    | 1.018  | 0.000    | -0.607 | -0.351   | 0.000   | -0.208   | -0.305 | -0.199 |
| CD16    | -2.190 | -0.056   | -1.508 | 1.802    | 0.262   | -0.320   | 0.000  | -0.950 |
| CD127   | -1.286 | 0.000    | -1.081 | -0.652   | -0.702  | -0.334   | -0.484 | 0.124  |
| CD1c    | 0.000  | 0.000    | 0.229  | -0.392   | -0.099  | -0.055   | -0.023 | -0.049 |
| CD123   | 0.252  | 3.691    | -0.117 | -0.091   | -0.500  | 0.260    | 2.766  | -0.550 |
| CD66b   | -0.351 | -0.149   | 0.621  | -0.472   | -0.051  | 0.213    | 0.000  | -0.025 |



|        |        |        |        |        |        |        |        |        |
|--------|--------|--------|--------|--------|--------|--------|--------|--------|
| CXCR5  | 0.369  | 0.000  | -0.586 | -0.712 | 0.051  | 0.011  | -0.247 | -0.285 |
| CD86   | 0.343  | -0.801 | -0.289 | 0.131  | -0.381 | 0.555  | 0.000  | -0.205 |
| CD27   | 0.078  | 0.000  | -0.486 | -0.330 | -0.026 | 0.009  | -0.372 | 0.194  |
| CCR5   | -0.410 | 0.000  | 0.241  | -0.025 | -0.654 | -0.221 | 0.021  | -0.030 |
| CD11c  | -0.155 | 0.000  | 1.749  | 0.307  | -0.006 | -0.223 | -1.376 | -0.452 |
| CD14   | -2.413 | 0.000  | -2.466 | 3.183  | -0.187 | 0.311  | -0.068 | -0.290 |
| CD56   | -0.107 | -0.115 | -0.889 | -1.504 | 2.630  | 3.975  | 0.000  | -4.611 |
| CD80   | -0.158 | 0.000  | 0.106  | 0.163  | -0.200 | -0.502 | 0.129  | -0.038 |
| CCR4   | 0.256  | 0.000  | 0.348  | 0.151  | -0.031 | 0.126  | -0.482 | 0.209  |
| CD40   | 0.302  | -0.184 | 0.127  | -0.065 | -0.063 | 0.144  | -0.141 | -0.244 |
| CCR6   | -0.307 | 0.000  | -0.114 | -0.336 | 0.000  | 0.205  | 0.000  | 0.088  |
| CD25   | 0.345  | 0.733  | -0.236 | -0.630 | 0.297  | -0.226 | -0.273 | 0.000  |
| CCR7   | 0.000  | 0.000  | -0.254 | 0.124  | -0.844 | -0.379 | 0.139  | -0.001 |
| CD3    | -0.602 | -0.011 | -0.556 | -0.639 | -2.269 | 2.809  | -0.314 | 2.193  |
| CX3CR1 | -0.129 | -0.278 | 0.000  | 0.226  | 0.289  | -0.087 | 0.364  | -0.602 |
| CD38   | 0.165  | 0.040  | -0.229 | -0.248 | 0.388  | -0.204 | 0.356  | -0.150 |
| CD161  | -0.165 | -0.609 | -0.428 | -0.726 | 0.512  | -0.025 | 0.023  | -0.173 |
| CD209  | -0.064 | 0.000  | 0.538  | 0.000  | 0.584  | 0.179  | 0.000  | -0.181 |
| CXCR3  | -0.406 | -0.685 | 0.000  | -0.146 | 0.313  | 0.007  | 0.967  | 0.100  |
| HLADR  | 0.547  | -1.758 | 0.987  | 0.373  | -1.134 | 0.114  | 0.659  | -0.239 |
| PD1    | -0.477 | 0.000  | -0.719 | 0.603  | -0.021 | 0.160  | 0.000  | 0.350  |
| CD54   | -0.398 | -0.025 | -0.299 | 0.000  | -0.165 | 0.021  | 0.196  | -0.100 |
| CD11b  | -0.475 | 0.000  | -0.406 | 0.043  | -0.459 | -0.212 | -0.787 | -0.587 |
| DNA    | -0.144 | -0.079 | 0.253  | 0.110  | -0.124 | -0.022 | 0.000  | 0.235  |

An important overall consideration regarding the logistic classifier is that it is not intended as a tool for comprehensive analysis and classification of the data, but is instead a preprocessing step that stratifies major cell subsets prior to performing unbiased Louvain community detection, with the primary goal of improving the detection of rarer cell subsets. Thus, the classifier is only an intermediate analysis, and all the population clusters identified through the combined automated classifier and community detection analysis are ultimately manually reviewed and annotated, thereby overcoming potential inaccuracies in the initial automated classification.

**4. The authors found several cell subsets that the CHIKV virus preferentially infects. In the paper it was noted that one of the four sub-communities of naïve B cells also exhibits correlation with CHIKV E2 protein, but it would be good to supply more characteristic details regarding the unique marker distribution that distinguish this sub community from the other three subgroups.**

We appreciate the reviewer's interest in the sub-community of naïve B cells whose frequency significantly correlated with CHIKV E2 protein expression, and agree that this might also be of interest to the general readership. To characterize the details of how this sub-community's marker expression differs from the other naïve B cells, we used a similar analysis and heatmap visualization as in Figure S7, which depicted the significantly different channels among the CD14+ monocytes. We have added the new analysis for the four sub-communities of naïve B cells in a new Supplementary Figure S2, which is reproduced below. This analysis is restricted to markers that differentiate sub-community 4 from the median value of the other three sub-communities at the threshold of a fold change > 1.5 and FDR < 0.05 (using a modified paired t-test under the mixed effects model), with colors representing  $\log_2$  fold change in channel intensity from the median for all communities (red denotes higher intensity). Notably, sub-community 4 is

characterized by a much higher expression of CXCR5 as compared to all other sub-communities of naïve B cells. This chemokine receptor, together with CCR7, is important for the migration of lymphocytes to secondary lymphoid tissues and is implicated in follicle formation within tissues.<sup>1,2</sup> Otherwise, the pattern of marker expression of sub-community 4 is very similar to sub-community 1 of naïve B cells, albeit with much lower expression of CCR4, CXCR3 and CD80. CXCR3 has been described as a marker for malignant B cells and is absent in normal naïve B cells in the blood.<sup>3</sup> CD80 is a marker that is pivotal for the activation of autoreactive T cells and plays an important role in the development of a form of rheumatoid arthritis.<sup>4</sup> In the light of this literature, it appears that the different types of naïve B cell communities that we detect in CHIKV-infected children reflect different degrees of activation. Subcommunity 1 and 4 seem to be more activated based on the higher expression of CCR4, CXCR3 and CD80 and could be transitioning into memory B cells.

Given these interesting findings, we have added a reference to this analysis in the Results on line 243, page 10, and included additional discussion about the above findings in the Discussion on line 584, page 24.

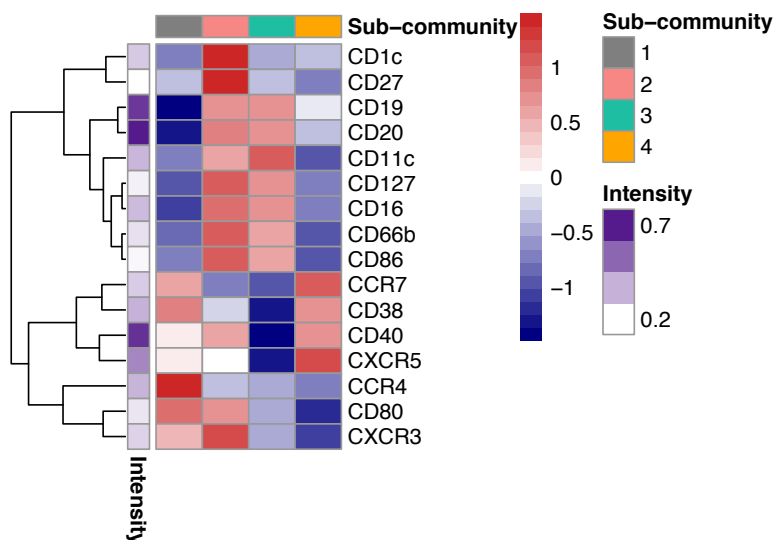

**Figure S2.** Heatmap of differences in marker protein expression between four naïve B cell sub-communities identified by MetaHybridLouvain. All channels listed here differentiate sub-community 4 from the median value for the other three sub-communities at a threshold of fold change  $> 1.5$  and  $FDR < 0.05$  (using a moderated paired t-test under the mixed effects model). Colors represent  $\log_2$  fold change in channel intensity from the median for all communities (red means higher intensity).

**5. The authors evaluate the clustering of samples according to several parameters (acute/convalescence phases, Ab titer, Viral titer, severity) by different sets of cell subset/sub-community frequency (Fig 2B, 3F) qualitatively. In order to make quantitative estimation, external indices for cluster validity can be evaluated including entropy, purity, precision, recall or F-measure.**

We agree with the reviewer that a quantitative measure of cluster validity would enhance the manuscript's qualitative evaluation of how well

hierarchical clustering separates CyTOF sub-community frequencies into acute vs. convalescent signatures. As suggested, we have calculated such external indices for the top-level clustering (incorporating MetaHybridLouvain sub-community frequencies) presented in Figure 3F, which produces: Jaccard similarity coefficient = 0.87, precision = 0.93, recall = 0.93, and F-measure = 0.93. This confirms the two major takeaways for the qualitative assessment we originally presented, which was that (1) clustering of MetaHybridLouvain sub-community frequencies separates the samples by time point with high accuracy, and that (2) performance is higher when using MetaHybridLouvain's unbiased identification of all leukocyte sub-communities as opposed to the canonical population labels alone (by comparison to Figure 2B, where Jaccard index = 0.61, precision = 0.76, recall = 0.76, and F-measure = 0.76). We thank the reviewer for this suggestion, as we believe this analysis enhances the manuscript, and we now report the above statistics in the Results section (lines 201 and 254 on pages 9 and 11, respectively). We have also added to the Materials and Methods that the tests were performed with the 'clusterCrit' R package (version 1.2.7) on Line 932, page 38.

**6. The authors did not find significant spearman correlation between CyTOF and luminex features.**

**a. this was followed by focused analysis of Pearson correlation between monocyte subpopulations and all cytokines. Why different correlation coefficients (Spearman Vs Pearson) were used?**

We appreciate the reviewer's concern that these analyses were performed with different correlation coefficients, which unnecessarily complicate comparisons across the series of figures, and we apologize for this technical oversight. In the revised manuscript, we have replaced the analysis in Figure S16 with Spearman's correlations, which results in a consistent method for Figures S13-S16, and we have updated the corresponding paragraph in the Results. This leaves our overall interpretation unchanged, as the magnitude of the correlations in Fig S16 was slightly diminished by using Spearman's correlation, but the convalescent-phase correlations for CCL2 are still significantly different from the correlations against all other cytokines at a new FDR of  $P = 0.015$  (this is updated in the Results section on Line 343, page 14). In this new analysis, CCL2 is the only cytokine to show significantly different correlations at a FDR  $P$  threshold of  $<0.05$ . Therefore, we retain the original conclusion of this section—that CCL2 appears to have a comparatively important regulatory role for monocyte populations during CHIKV infection progression. The new Fig S16 is reproduced below.



during the acute phase of infection in concurrence with CCL2's significant upregulation at this timepoint (Fig 5B), which is consistent with the monocyte-centric response detailed by our study.

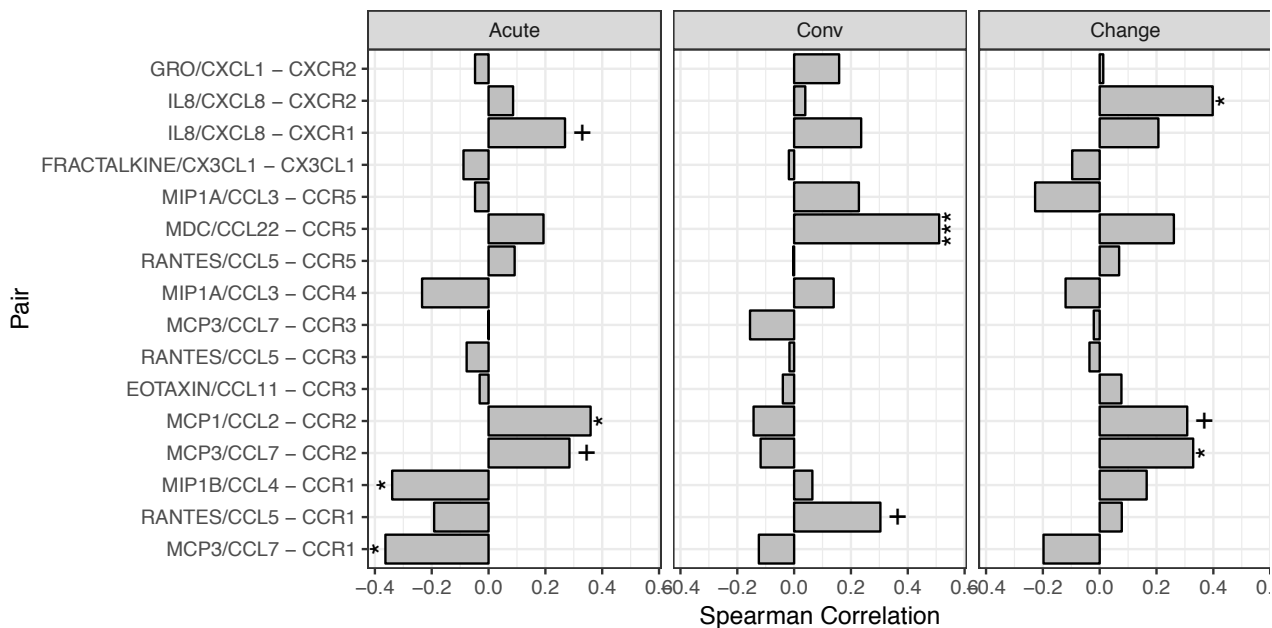

**Figure Legend: Correlation plots of chemokine ligands and their cognate chemokine receptor during the acute and convalescent phase of CHIKV infection.** Spearman's correlations between the protein concentrations of the cytokines profiled by Luminex and the abundance of their receptors, quantified by RNA-seq at the gene expression level for acute and convalescent (conv) time points. The overall changes of ligand and receptor levels comparing convalescent versus acute. (+ $p < 0.1$ ; \* $p < 0.05$ ; \*\* $p < 0.01$ ; \*\*\* $p < 0.001$ )

**c. Luminex analysis is often much better performed directly on MFI rather than on the concentrations - this may be something the authors can consider doing.**

The reviewer correctly notes that analysis directly on MFI values can provide benefits over using concentration values because it obviates censoring of values beyond the detection limits, and this may increase power.<sup>5</sup> Therefore, we have also analyzed the data using MFI values and find that both methods identify the same set of cytokines to be significantly different—with the sole exception of TGF- $\alpha$ , which is significant at FDR  $P < 0.05$  using the MFI data, but for which the FDR-adjusted  $P$  value for the standard-curve concentrations is 0.06. Moreover, a high correlation is observed between the calculated fold changes for each method (Pearson's  $r = 0.86$ , 95% CI [0.75–0.92]; Spearman's  $\rho = 0.93$ , 95% CI [0.84–0.96]). Since our overall results are essentially unchanged under either approach, we have opted to present the analysis using concentrations (in pg/mL) as it is more readily interpretable to a biological audience and simpler to compare to prior studies of CHIKV-induced cytokine changes, which uniformly present their Luminex results using standard-curve concentrations.<sup>6–10</sup>

The Figure below is a scatterplot of log fold changes estimated from net

MFI values against log fold changes estimated from concentration values for all cytokines; the high correlation previously mentioned is readily observed as the positive linear trend, and the one exception to statistical significance as determined by the FDR-adjusted  $P$  value threshold of 0.05 is labeled (TGfA). In general, the two analyses result in concordant significantly (red) and non-significantly (blue) differentially expressed cytokines.

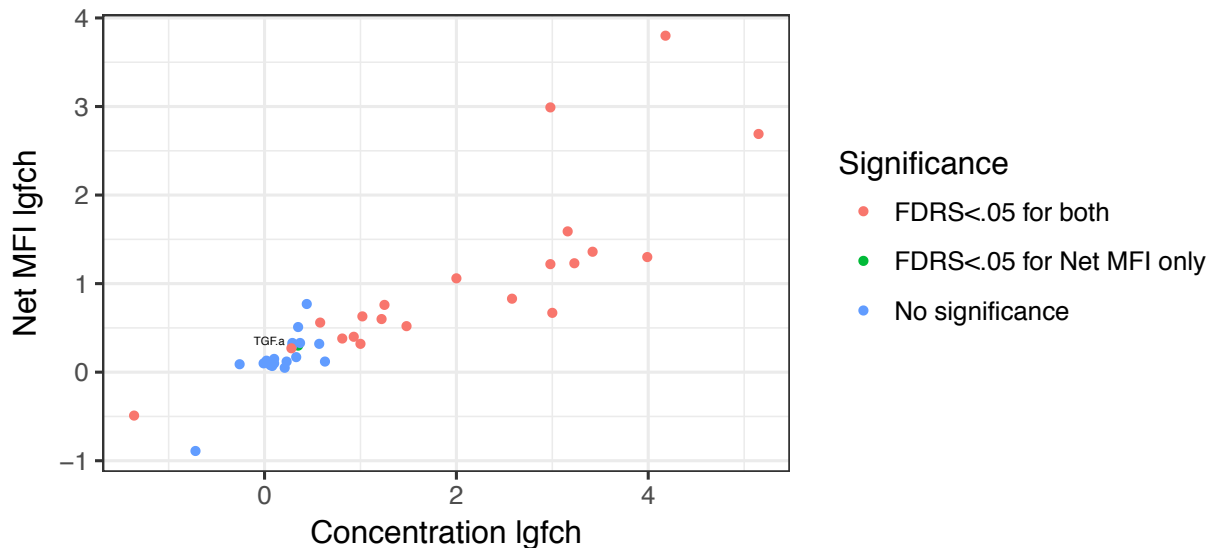

**Figure Legend. Protein concentration changes and net mean fluorescence intensity (MFI) values are correlated.** Log fold changes as determined by analysis of concentration values (X axis) against the same as determined by net mean fluorescence intensity (MFI) values (Y axis). As expected, a positive correlation is observed (Pearson's  $r = 0.86$ , Spearman's  $\rho = 0.93$ ). Each cytokine is represented as a separate point, and is colored by whether it reaches statistical significance at FDR-adjusted  $P < 0.05$  (Mann-Whitney  $U$ ) in neither, one, or both analyses.

**7. The authors found significant change in monocytes subsets using CyTOF, and a change in markers intensity that differentiate between the relevant sub-communities. Do the relevant markers were also found to be differentially expressed in the GX data between time points? If such differences are also observed in the GX data, it might indicate that these changes were originated from the change in monocytes abundance.**

We thank the reviewer for this interesting idea. It prompts a focused query of gene expression changes for the CyTOF markers differentiating the various subpopulations of monocytes, with the hypothesis that the observed subpopulation phenotypes and frequency shifts may help explain the gene expression changes. Given the interesting sub-phenotypes we discovered for CD14<sup>+</sup> monocytes in this study, including one (sub-community 3) that displayed substantial expression of CCR4, CXCR3, and CCR6, which are markers not classically associated with monocytes, we focus our response on CD14<sup>+</sup> monocytes. Querying for differentially expressed transcripts mapping to the genes for the markers seen in Figure 4B (which are the markers that most differentiate the three sub-communities at FDR < 0.05

and fold change > 1.3) produces the table below, which is a filtered subset of Table S4. We found that CCR7, CCR4 and CCR6, which are mostly expressed on CD14<sup>+</sup> sub-community 3, were significantly downregulated during the acute phase as compared to convalescence, while CD80, CD40, CD123, CD86 and CD54 (highly expressed on CD14<sup>+</sup> sub-community 1) were upregulated during the acute phase of infection (both FDR<0.05). These findings from the gene expression data reflect the cell frequency changes we measured by CyTOF whereby sub-community 1 is very high during the acute phase as compared to a lower abundance of sub-community 3. Thus, our gene expression data is consistent with the CyTOF data, which indicates that these changes in gene expression originated from the change in monocyte frequency. We have included these data in the Results section in Line 310, page 13 and in Table S1.

**Table S1.** Gene expression analysis of markers that are significantly different between CD14<sup>+</sup> monocyte subpopulations (from Fig. 4B) during acute and convalescence

| Acute – Conv |         | lgFCH | FCH   | pvals    | fdrs     |
|--------------|---------|-------|-------|----------|----------|
| CCR7         | CCR7    | -1.1  | -2.14 | 1.2E-11  | 6.52E-11 |
| CCR4         | CCR4    | -0.74 | -1.67 | 8.23E-15 | 6.98E-14 |
| CCR6         | CCR6    | -0.73 | -1.66 | 8.55E-10 | 3.6E-09  |
| CD66b        | CEACAM8 | 0.02  | 1.01  | 0.927    | 0.941    |
| CD80         | CD80    | 0.16  | 1.11  | 0.0207   | 0.0305   |
| CX3CR1       | CX3CR1  | 0.22  | 1.17  | 0.0515   | 0.0706   |
| CD40         | CD40    | 0.24  | 1.18  | 0.0307   | 0.0439   |
| CD123        | IL3RA   | 0.49  | 1.41  | 0.000185 | 0.000378 |
| CD86         | CD86    | 0.55  | 1.47  | 1.62E-10 | 7.56E-10 |
| CD54         | ICAM1   | 1.25  | 2.38  | 1.16E-12 | 7.23E-12 |

**8. Building a network, which includes multiple data types one always runs into the issue that due to technical noise within assay results better correlate than across assays. There are multiple ways of dealing with this (e.g. different cutoffs, separate within data and across data calculations etc). Doing so may eliminate much technical based noise from data and highlight the more interesting signals. Similarly - give the authors identification of an interesting cell subset - perhaps a better approach would be to simply focus on what correlates with it.**

We certainly agree with the reviewer's observation that within-assay results tend to correlate better than across assays, as this is strongly reflected in our results; in fact, the Luminex data intracorrelated to such a degree that it was eventually dropped from our cross-assay (i.e., multiscale) analyses (see Fig S27; Fig 7D; Fig S28C) for lack of predictive value compared to the CyTOF and RNA-seq data. The unsupervised clustering techniques intrinsic to the WGCNA and MultiHybridLouvain methods are actually the foundation of our strategy for reducing technical noise: they condense thousands of dimensions into simpler modules (coEMs) and sub-communities, producing more stable averages from noisy, intracorrelated input data. We prefer these clustering techniques for network construction because they increase

the “signal” of globally significant changes without involving the subjectivity of picking cutoffs/filters for the data or comparisons thereof—which may unintentionally introduce the experimenters’ bias into the signal that remains. Although we did identify an interesting cell subset (monocytes) using CyTOF toward the beginning of the study and this indeed sets the overall theme for our discussion, we intentionally tried to avoid restricting our hypotheses based on early results from one experimental method. As presented in the title, our aim is to deliver “comprehensive innate immune profiling” of CHIKV. Therefore, we place RNA-seq, CyTOF, and Luminex data on an equal footing when modeling the various clinical parameters of CHIKV infection, and this is why our manuscript presents and explores each data type *de novo* in their own sections before introducing the final integrative analysis. Furthermore, this is our rationale for equally weighting the WGCNA modules, MetaHybridLouvain communities, and clinical variables when constructing the integrative network presented in Fig 7D.

### 9. Notably - gene expression data in whole blood greatly reflects cell composition, and it would be of interest to adjust the data for this.

We agree with the reviewer that the main signal for gene differential expression is likely reflective of the changes in cell composition well established by the CyTOF results. In order to investigate this, from our quantified RNA-seq data, we derived lists of genes upregulated in the acute phase of CHIKV infection compared to the convalescent phase (adjusted  $P$  value  $<0.001$ , paired t-test), as well as genes upregulated in the convalescent phase. When comparing the expression levels of these genes across a panel of hematopoietic cells of different lineages,<sup>11</sup> we observed genes with higher expression in the acute phase tend to be overexpressed in granulocytes and monocytes (panel A below; note columns corresponding to the black GM label), while genes with higher expression in the convalescent phase tend to be overexpressed in T cells and B cells (panel B; note columns corresponding to the purple and pink BCELL and TCELL labels).

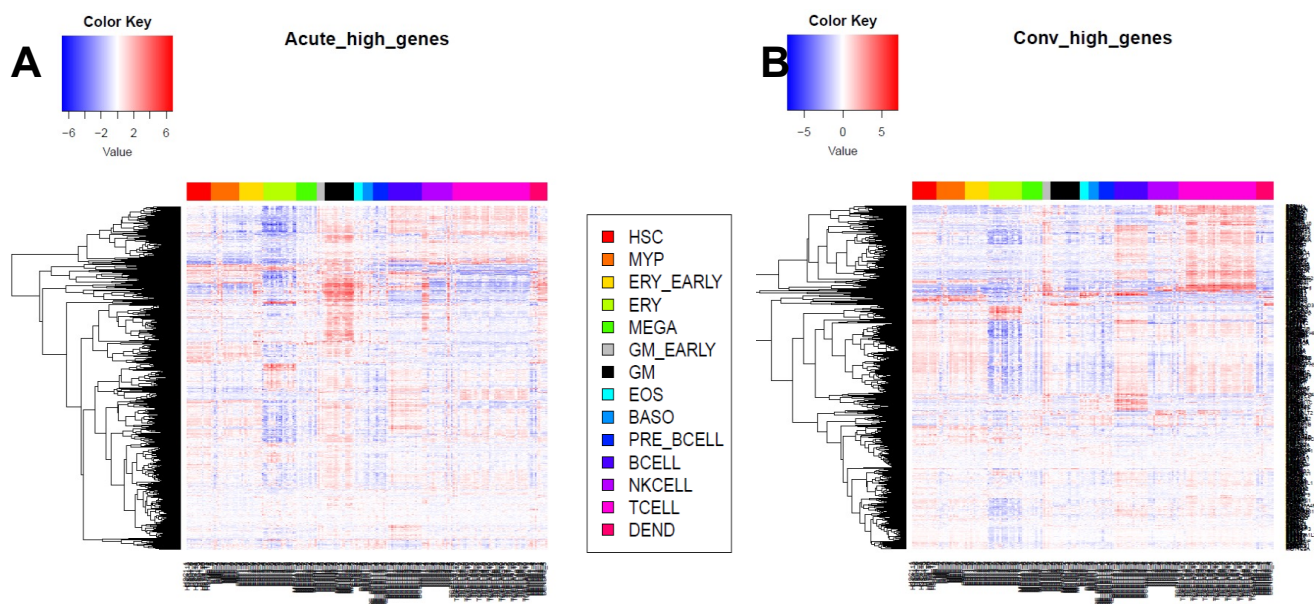



**Figure S24.** Heatmap of gene expression across different types of blood cells for genes expressed higher in acute phase (A) or higher in convalescent phase (B). Rows represent genes. Columns represent blood cells, which are grouped according to the lineage (column legend). HSC, Hematopoietic stem cell; MYP, Myeloid progenitor; ERY, Erythroid cell; MEGA, Megakaryocyte; GM, Granulocyte/monocyte; EOS, Eosinophil, BASO, Basophil; DEND, Dendritic cell

Next, we used computational methods to estimate cell components based on gene expression profiles of admixtures. To deconvolute gene expression data to the cell type proportion, we utilized known cell subset-specific marker genes of six major blood cell types obtained from the *IRIS* project,<sup>12</sup> and estimated abundance of each cell type by the average expression of its markers. Also, we used the recently developed algorithm *CIBERSORT*<sup>13</sup> which requires an input matrix of reference gene expression signatures of different cell subsets. The *CIBERSORT* R package and its associated leukocyte signature matrix of 22 cell types were utilized with all default parameters.

We then compared the above cell component results derived from gene expression with CyTOF results. As shown in the figure below, the computational estimation and CyTOF readouts agree well with each other: the correlation between the same or similar cell types is generally much higher (red cells; compare labels in rows vs. columns) than between different cell types (blue cells). This demonstrates an overall consistency between the gene expression and CyTOF data for the purpose of estimating cell subpopulations.

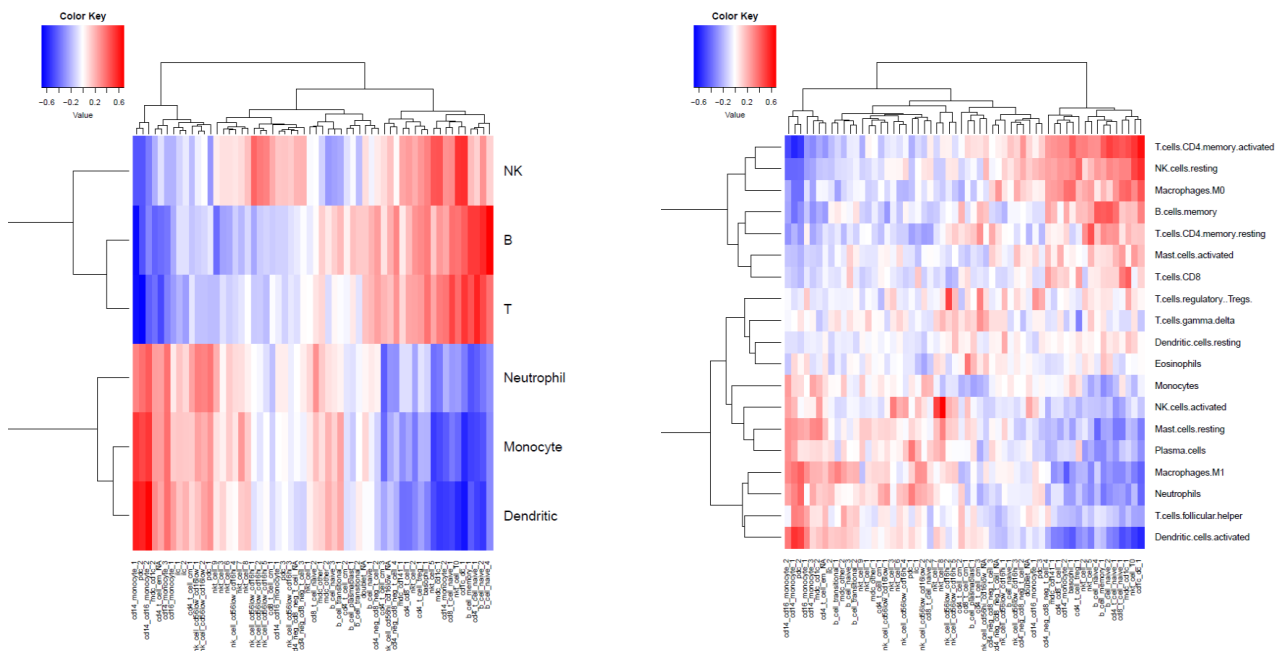

**Figure S25.** Correlation between cell frequency derived from CyTOF and that estimated from gene expression using expression of cell-specific markers (left) or the *CIBERSORT* algorithm (right).

Finally, as requested by the reviewer, we aimed to identify differentially expressed genes that are not purely caused by cellular component changes. To achieve this, we adjusted each gene's expression according to cellular abundance. Due to the relatively small sample size, we only considered the abundance of six main types of blood cells estimated by the average expression of cell markers (as described above): i.e., B cells, T cells, NK cells, monocytes, neutrophils and dendritic cells. Specifically, we used linear regression to obtain the residual gene expression after considering the cell abundance of the six major cell types in the model. We then used paired t tests to obtain differentially expressed genes between the acute and convalescent phases. In this way, we obtained only 132 differentially expressed genes with a nominal  $P$  value  $< 0.05$ , and none of them remained significant at  $FDR < 0.05$  after multiple hypothesis correction. Therefore, the main signal of differential gene expression in whole blood is indeed strongly derived from the changes in cell subpopulation frequencies.

We have included these new findings in the Results in lines 515, page 17, along with the new Figures S24 and S25 that are reproduced above. The technical approach for this analysis was added to the Supplementary Methods section on lines 298, page 36.

**10. I would suggest edits to the text to flesh out here the biology and compact the technical analyses, much of which should be moved to supp or Methods.**

We thank the reviewer for this valuable comment. We have moved many of the technical sections within the Results and Discussion to the Materials and Methods and Supplemental Methods section to make the manuscript more compact and improve readability. Furthermore, we have also expanded the biological interpretation within the analyses throughout the manuscript.

**Minor comments:**

**- The statistical test in addition to FDR in parenthesis is not always included in the text i.e. Wilcoxon signed-rank test in line 213.**

We thank the reviewer for pointing this out. We have made the manuscript more consistent and added the statistical test used for each analysis in the Materials and Methods section and also within the parentheses in the text as needed.

**- Figure 7B: it is recommended to also add secondary y axis for q values (as shown in figure S26) or for total count of overlapping DETs, because the DET enrichment in specific module depends on the module size.**

We agree with the reviewer that the addition of a secondary axis would be beneficial for the interpretation of Fig 7B. We have therefore added the secondary axis to Fig 7B and removed the former Fig S26 from the Supplementary Material. The new Fig 7B is depicted below, wherein the  $q$  values are depicted as red asterisks on the secondary (log-scaled) axis, now labeled in red on the right side of the plot. To aid in interpretation, the dotted horizontal line originally in Fig S26 at the traditional cutoff of  $FDR < 0.05$  is added to Fig 7B as well, also in red.

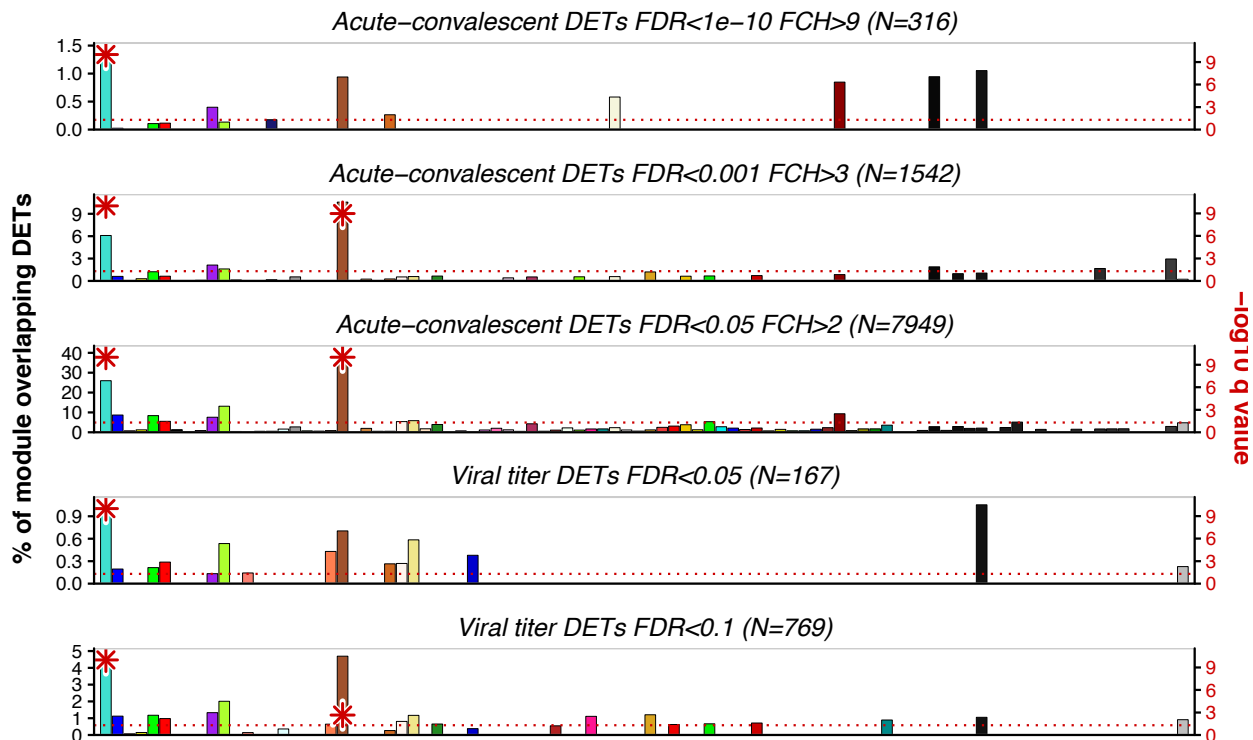

**Figure 7B.** Enrichment of five subsets of the DET signatures for CHIKV infection phase and viral titer (see Figs 6A and 6C) among each of the 92 coEMs (X axis), showing the fractional overlap of the module with the DET signature (Y axis). Negative log<sub>10</sub>  $q$  values (Benjamini-Hochberg adjusted  $P$  values; Fisher's exact test) are depicted as red asterisks on the secondary Y axis (right hand side), clipped to a maximum of 10. The only modules with overlaps in any of the subsets that exceed  $FDR < 0.05$  are turquoise and sienna. The horizontal line indicates a threshold of  $FDR < 0.05$ .

## References

- 1 Stein J V., Nombela-Arrieta C. Chemokine control of lymphocyte trafficking: A general overview. *Immunology* 2005; **116**: 1–12.
- 2 Cozine CL, Wolniak KL, Waldschmidt TJ. The primary germinal center response in mice. *Curr Opin Immunol* 2005; **17**: 298–302.
- 3 Trentin L, Agostini C, Facco M, Piazza F, Perin A, Siviero M, Gurrieri C, Galvan S, Adami F, Zambello R, Semenzato G. The chemokine receptor CXCR3 is expressed on malignant B cells and mediates chemotaxis. *J Clin Invest* 1999; **104**: 115–21.
- 4 O'Neill SK, Cao Y, Hamel KM, Doodes PD, Hutas G, Finnegan A. Expression of CD80/86 on B Cells Is Essential for Autoreactive T Cell Activation and the Development of Arthritis. *J Immunol* 2007; **179**: 5109–16.

- 5 Breen EJ, Tan W, Khan A. The Statistical Value of Raw Fluorescence Signal in Luminex xMAP Based Multiplex Immunoassays. *Sci Rep* 2016; **6**: 1–13.
- 6 Teng T-S, Kam Y-W, Lee B, Hapuarachchi HC, Wimal A, Ng L-C, Ng LFP. A Systematic Meta-analysis of Immune Signatures in Patients With Acute Chikungunya Virus Infection. *J Infect Dis* 2015; **211**: 1925–35.
- 7 Chaaitanya IK, Muruganandam N, Sundaram SG, Kawalekar O, Sugunan AP, Manimunda SP, Ghosal SR, Muthumani K, Vijayachari P. Role of proinflammatory cytokines and chemokines in chronic arthropathy in CHIKV infection. *Viral Immunol* 2011; **24**: 265–71.
- 8 Ng LFP, Chow A, Sun Y-J, Kwek DJC, Lim P-L, Dimatatac F, Ng L-C, Ooi E-E, Choo K-H, Her Z, Kourilsky P, Leo Y-S. IL-1beta, IL-6, and RANTES as biomarkers of Chikungunya severity. *PLoS One* 2009; **4**: e4261.
- 9 Chow A, Her Z, Ong EKS, Chen J, Dimatatac F, Kwek DJC, Barkham T, Yang H, Rénia L, Leo Y-S, Ng LFP. Persistent arthralgia induced by Chikungunya virus infection is associated with interleukin-6 and granulocyte macrophage colony-stimulating factor. *J Infect Dis* 2011; **203**: 149–57.
- 10 Schilte C, Staikovsky F, Couderc T, Madec Y, Carpentier F, Kassab S, Albert ML, Lecuit M, Michault A. Chikungunya Virus-associated Long-term Arthralgia: A 36-month Prospective Longitudinal Study. *PLoS Negl Trop Dis* 2013; **7**. DOI:10.1371/journal.pntd.0002137.
- 11 Novershtern N, Subramanian A, Lawton LN, Mak RH, Haining WN, McConkey ME, Habib N, Yosef N, Chang CY, Shay T, Frampton GM, Drake ACB, Leskov I, Nilsson B, Preffer F, Dombkowski D, Evans JW, Liefeld T, Smutko JS, Chen J, Friedman N, Young RA, Golub TR, Regev A, Ebert BL. Densely interconnected transcriptional circuits control cell states in human hematopoiesis. *Cell* 2011; **144**: 296–309.
- 12 Abbas AR, Baldwin D, Ma Y, Ouyang W, Gurney A, Martin F, Fong S, van Lookeren Campagne M, Godowski P, Williams PM, Chan AC, Clark HF. Immune response in silico (IRIS): Immune-specific genes identified from a compendium of microarray expression data. *Genes Immun* 2005; **6**: 319–31.
- 13 Newman AM, Liu CL, Green MR, Gentles AJ, Feng W, Xu Y, Hoang CD, Diehn M, Alizadeh AA. Robust enumeration of cell subsets from tissue expression profiles. *Nat Methods* 2015; **12**: 453–7.

---

2nd Editorial Decision

3<sup>rd</sup> May 2018

Thank you again for submitting your work to Molecular Systems Biology. We have now finally heard back from the referees who accepted to evaluate the study. They are now supportive and I am pleased to inform you that we will be able to accept your paper for publication in Molecular Systems Biology pending the minor amendments listed below.

YOU MUST COMPLETE ALL CELLS WITH A PINK BACKGROUND ↓

PLEASE NOTE THAT THIS CHECKLIST WILL BE PUBLISHED ALONGSIDE YOUR PAPER

Corresponding Author Name: Eva Harris

Journal Submitted to: Molecular Systems Biology

Manuscript Number: MSB-17-7862

**Reporting Checklist For Life Sciences Articles (Rev. July 2015)**

This checklist is used to ensure good reporting standards and to improve the reproducibility of published results. These guidelines are consistent with the Principles and Guidelines for Reporting Preclinical Research issued by the NIH in 2014. Please follow the journal's authorship guidelines in preparing your manuscript.

**A- Figures****1. Data**

The data shown in figures should satisfy the following conditions:

- the data were obtained and processed according to the field's best practice and are presented to reflect the results of the experiments in an accurate and unbiased manner.
- figure panels include only data points, measurements or observations that can be compared to each other in a scientifically meaningful way.
- graphs include clearly labeled error bars for independent experiments and sample sizes. Unless justified, error bars should not be shown for technical replicates.
- if  $n < 5$ , the individual data points from each experiment should be plotted and any statistical test employed should be justified
- Source Data should be included to report the data underlying graphs. Please follow the guidelines set out in the author ship guidelines on Data Presentation.

**2. Captions**

Each figure caption should contain the following information, for each panel where they are relevant:

- a specification of the experimental system investigated (eg cell line, species name).
- the assay(s) and method(s) used to carry out the reported observations and measurements
- an explicit mention of the biological and chemical entity(ies) that are being measured.
- an explicit mention of the biological and chemical entity(ies) that are altered/varied/perturbed in a controlled manner.
- the exact sample size (n) for each experimental group/condition, given as a number, not a range;
- a description of the sample collection allowing the reader to understand whether the samples represent technical or biological replicates (including how many animals, litters, cultures, etc.).
- a statement of how many times the experiment shown was independently replicated in the laboratory.
- definitions of statistical methods and measures:
  - common tests, such as t-test (please specify whether paired vs. unpaired), simple  $\chi^2$  tests, Wilcoxon and Mann-Whitney tests, can be unambiguously identified by name only, but more complex techniques should be described in the methods section;
  - are tests one-sided or two-sided?
  - are there adjustments for multiple comparisons?
  - exact statistical test results, e.g., P values = x but not P values < x;
  - definition of 'center values' as median or average;
  - definition of error bars as s.d. or s.e.m.

Any descriptions too long for the figure legend should be included in the methods section and/or with the source data.

Please ensure that the answers to the following questions are reported in the manuscript itself. We encourage you to include a specific subsection in the methods section for statistics, reagents, animal models and human subjects.

In the pink boxes below, provide the page number(s) of the manuscript draft or figure legend(s) where the information can be located. Every question should be answered. If the question is not relevant to your research, please write NA (non applicable).

**B- Statistics and general methods**

Please fill out these boxes ↓ (do not worry if you cannot see all your text once you press return)

|                                                                                                                                                                                         |                                                                                                                                                                                                                                                                                                                                                                                                                                                                                                                                                                                                                                                                     |
|-----------------------------------------------------------------------------------------------------------------------------------------------------------------------------------------|---------------------------------------------------------------------------------------------------------------------------------------------------------------------------------------------------------------------------------------------------------------------------------------------------------------------------------------------------------------------------------------------------------------------------------------------------------------------------------------------------------------------------------------------------------------------------------------------------------------------------------------------------------------------|
| 1.a. How was the sample size chosen to ensure adequate power to detect a pre-specified effect size?                                                                                     | NA: There was no pre-specified effect size in this study, as we explore global changes in gene expression, cell subpopulations, and cytokine levels using a hypothesis-neutral approach. However, as the final aim of the study was to integrate all three datasets into a multiscale network using WGCNA and other correlational network techniques, we adhered to the WGCNA recommendation of >20 biological samples (see <a href="https://labs.genetics.ucla.edu/honwath/CoexpressionNetwork/Rpackages/WGCNA/faq.html">https://labs.genetics.ucla.edu/honwath/CoexpressionNetwork/Rpackages/WGCNA/faq.html</a> ), using a final total of 42 patients (+1 extra). |
| 1.b. For animal studies, include a statement about sample size estimate even if no statistical methods were used.                                                                       | NA: Not an animal study                                                                                                                                                                                                                                                                                                                                                                                                                                                                                                                                                                                                                                             |
| 2. Describe inclusion/exclusion criteria if samples or animals were excluded from the analysis. Were the criteria pre-established?                                                      | Page 7 at "Clinical characteristics of study participants" and page 33 at "Study participants"                                                                                                                                                                                                                                                                                                                                                                                                                                                                                                                                                                      |
| 3. Were any steps taken to minimize the effects of subjective bias when allocating animals/samples to treatment (e.g. randomization procedure)? If yes, please describe.                | NA: There was no treatment arm of the study. The study was purely observational.                                                                                                                                                                                                                                                                                                                                                                                                                                                                                                                                                                                    |
| For animal studies, include a statement about randomization even if no randomization was used.                                                                                          | NA: Not an animal study                                                                                                                                                                                                                                                                                                                                                                                                                                                                                                                                                                                                                                             |
| 4.a. Were any steps taken to minimize the effects of subjective bias during group allocation or/and when assessing results (e.g. blinding of the investigator)? If yes please describe. | Page 7 at "Clinical characteristics of study participants". The only group allocation in this study with a potentially subjective component was the separation of cases into "more severe" and "less severe" symptomatology. For this, we used a rubric based on objective criteria (peak temperature >38.5°C and nadir platelet count <100k) developed and used in prior studies, whose authors had no affiliation with this study. All other group allocations (e.g., acute vs. convalescent timepoints) were prespecified in the study protocol and not subject to potential bias.                                                                               |
| 4.b. For animal studies, include a statement about blinding even if no blinding was done                                                                                                | NA: Not an animal study                                                                                                                                                                                                                                                                                                                                                                                                                                                                                                                                                                                                                                             |
| 5. For every figure, are statistical tests justified as appropriate?                                                                                                                    | Yes (see all figures)                                                                                                                                                                                                                                                                                                                                                                                                                                                                                                                                                                                                                                               |
| Do the data meet the assumptions of the tests (e.g., normal distribution)? Describe any methods used to assess it.                                                                      | Page 43 at "Statistical analyses". In general, we use linear mixed effects models to account for the paired structure of the data while modeling the effects of several covariates, using lme4's standard implementation and moderated paired t-tests. Cytof and Luminex data was log transformed to achieve normality. Mixed-effect model are a robust methodology in the presence of missing values, even under the MAR assumption.                                                                                                                                                                                                                               |
| Is there an estimate of variation within each group of data?                                                                                                                            | Pages 39 at "Differential expression analyses" and 43 at "Statistical analyses". Variances for each group are estimated and presented. In the case of mixed-effect models, the variances are included in the parameters being estimated.                                                                                                                                                                                                                                                                                                                                                                                                                            |
| Is the variance similar between the groups that are being statistically compared?                                                                                                       | Pages 39 at "Differential expression analyses" and 43 at "Statistical analyses". Since we use mixed-effect models, the variance is part of the model specification; i.e. the covariance structure of the data was established by comparing competing models                                                                                                                                                                                                                                                                                                                                                                                                         |

**C- Reagents****USEFUL LINKS FOR COMPLETING THIS FORM**

<http://www.antibodypedia.com>  
<http://1degrebio.org>  
<http://www.equator-network.org/reporting-guidelines/improving-bioscience-research-rpo>  
<http://grants.nih.gov/grants/olaw/olaw.htm>  
<http://www.mrc.ac.uk/Ourresearch/Ethicsresearchguidance/Useofanimals/index.htm>  
<http://clinicaltrials.gov>  
<http://www.consort-statement.org>  
<http://www.consort-statement.org/checklists/view/32-consort/66-title>  
<http://www.equator-network.org/reporting-guidelines/reporting-recommendations-for-tun>  
<http://datadrivad.org>  
<http://figshare.com>  
<http://www.ncbi.nlm.nih.gov/gap>  
<http://www.ebi.ac.uk/ega>  
<http://biomodels.net/>  
<http://biomodels.net/miriam/>  
<http://jji.biochem.sun.ac.za>  
[http://oba.od.nih.gov/biosecurity/biosecurity\\_documents.html](http://oba.od.nih.gov/biosecurity/biosecurity_documents.html)  
<http://www.selectagents.gov/>

|                                                                                                                                                                                                                                                                                                                               |                                                                                                                                                                   |
|-------------------------------------------------------------------------------------------------------------------------------------------------------------------------------------------------------------------------------------------------------------------------------------------------------------------------------|-------------------------------------------------------------------------------------------------------------------------------------------------------------------|
| 6. To show that antibodies were profiled for use in the system under study (assay and species), provide a citation, catalog number and/or clone number, supplementary information or reference to an antibody validation profile. e.g., Antibodypedia (see link list at top right), 10DegreeBio (see link list at top right). | Table EV8. All conjugated antibodies were validated to confirm successful metal labeling and titrated using appropriate positive and negative biological controls |
| 7. Identify the source of cell lines and report if they were recently authenticated (e.g., by STR profiling) and tested for mycoplasma contamination.                                                                                                                                                                         | NA: No cell lines used in this study.                                                                                                                             |

\* for all hyperlinks, please see the table at the top right of the document

#### D- Animal Models

|                                                                                                                                                                                                                                                                                                                                                                                    |                          |
|------------------------------------------------------------------------------------------------------------------------------------------------------------------------------------------------------------------------------------------------------------------------------------------------------------------------------------------------------------------------------------|--------------------------|
| 8. Report species, strain, gender, age of animals and genetic modification status where applicable. Please detail housing and husbandry conditions and the source of animals.                                                                                                                                                                                                      | NA: Not an animal study. |
| 9. For experiments involving live vertebrates, include a statement of compliance with ethical regulations and identify the committee(s) approving the experiments.                                                                                                                                                                                                                 | NA: Not an animal study. |
| 10. We recommend consulting the ARRIVE guidelines (see link list at top right) (PLoS Biol. 8(6), e1000412, 2010) to ensure that other relevant aspects of animal studies are adequately reported. See author guidelines, under 'Reporting Guidelines'. See also: NIH (see link list at top right) and MRC (see link list at top right) recommendations. Please confirm compliance. | NA: Not an animal study. |

#### E- Human Subjects

|                                                                                                                                                                                                                                                                                                                    |                                                                                                                                                                                                                                                                                                                            |
|--------------------------------------------------------------------------------------------------------------------------------------------------------------------------------------------------------------------------------------------------------------------------------------------------------------------|----------------------------------------------------------------------------------------------------------------------------------------------------------------------------------------------------------------------------------------------------------------------------------------------------------------------------|
| 11. Identify the committee(s) approving the study protocol.                                                                                                                                                                                                                                                        | Page 33 at "Study Participants." This study was conducted as a collaboration between the Nicaraguan Ministry of Health and the University of California, Berkeley and was reviewed and approved by the Institutional Review Boards (IRB) of the University of California, Berkeley, and the Nicaraguan Ministry of Health. |
| 12. Include a statement confirming that informed consent was obtained from all subjects and that the experiments conformed to the principles set out in the WMA Declaration of Helsinki and the Department of Health and Human Services Belmont Report.                                                            | Page 33 at "Study Participants." Parents or legal guardians of all subjects provided written informed consent, and subjects 6 years of age and older provided verbal assent as approved by the IRBs.                                                                                                                       |
| 13. For publication of patient photos, include a statement confirming that consent to publish was obtained.                                                                                                                                                                                                        | NA: No photos used                                                                                                                                                                                                                                                                                                         |
| 14. Report any restrictions on the availability (and/or on the use) of human data or samples.                                                                                                                                                                                                                      | NA: No restrictions on availability or use of the data                                                                                                                                                                                                                                                                     |
| 15. Report the clinical trial registration number (at ClinicalTrials.gov or equivalent), where applicable.                                                                                                                                                                                                         | NA: Not a clinical trial                                                                                                                                                                                                                                                                                                   |
| 16. For phase II and III randomized controlled trials, please refer to the CONSORT flow diagram (see link list at top right) and submit the CONSORT checklist (see link list at top right) with your submission. See author guidelines, under 'Reporting Guidelines'. Please confirm you have submitted this list. | NA: Not an RCT                                                                                                                                                                                                                                                                                                             |
| 17. For tumor marker prognostic studies, we recommend that you follow the REMARK reporting guidelines (see link list at top right). See author guidelines, under 'Reporting Guidelines'. Please confirm you have followed these guidelines.                                                                        | NA: Not a tumor marker prognostic study                                                                                                                                                                                                                                                                                    |

#### F- Data Accessibility

|                                                                                                                                                                                                                                                                                                                                                                                                                                                                                                                                                                                                                                                                                                  |                                                                                                                                                                                                                                                                                             |
|--------------------------------------------------------------------------------------------------------------------------------------------------------------------------------------------------------------------------------------------------------------------------------------------------------------------------------------------------------------------------------------------------------------------------------------------------------------------------------------------------------------------------------------------------------------------------------------------------------------------------------------------------------------------------------------------------|---------------------------------------------------------------------------------------------------------------------------------------------------------------------------------------------------------------------------------------------------------------------------------------------|
| 18. Provide accession codes for deposited data. See author guidelines, under 'Data Deposition'.<br>Data deposition in a public repository is mandatory for:<br>a. Protein, DNA and RNA sequences<br>b. Macromolecular structures<br>c. Crystallographic data for small molecules<br>d. Functional genomics data<br>e. Proteomics and molecular interactions                                                                                                                                                                                                                                                                                                                                      | Page 43: at "Data and software availability"                                                                                                                                                                                                                                                |
| 19. Deposition is strongly recommended for any datasets that are central and integral to the study; please consider the journal's data policy. If no structured public repository exists for a given data type, we encourage the provision of datasets in the manuscript as a Supplementary Document (see author guidelines under 'Expanded View' or in unstructured repositories such as Dryad (see link list at top right) or Figshare (see link list at top right)).                                                                                                                                                                                                                          | Page 43: at "Data and software accessibility"                                                                                                                                                                                                                                               |
| 20. Access to human clinical and genomic datasets should be provided with as few restrictions as possible while respecting ethical obligations to the patients and relevant medical and legal issues. If practically possible and compatible with the individual consent agreement used in the study, such data should be deposited in one of the major public access controlled repositories such as dbGAP (see link list at top right) or EGA (see link list at top right).                                                                                                                                                                                                                    | Page 43. at "Data and software accessibility". Clinical data is provided via the ImmPort deposition listed in the Data Availability section. There was no genomic DNA sequenced in this study; however RNA-seq transcriptomic data is deposited in GEO with corresponding raw reads in SRA. |
| 21. As far as possible, primary and referenced data should be formally cited in a Data Availability section. Please state whether you have included this section.<br>Examples:<br><b>Primary Data</b><br>Wetmore KM, Deuschbauer AM, Price MN, Arkin AP (2012). Comparison of gene expression and mutant fitness in <i>Shewanella oneidensis</i> MR-1. Gene Expression Omnibus GSE39462<br><b>Referenced Data</b><br>Huang J, Brown AF, Lei M (2012). Crystal structure of the TRBD domain of TERT and the CR4/5 of TR. Protein Data Bank 4O26<br>RAP-MS analysis of human histone deacetylase interactions in CEM-T cells (2013). PRIDE PX0000208                                               | NA: No primary or referenced data was used in this study                                                                                                                                                                                                                                    |
| 22. Computational models that are central and integral to a study should be shared without restrictions and provided in a machine-readable form. The relevant accession numbers or links should be provided. When possible, standardized format (SBML, CellML) should be used instead of scripts (e.g. MATLAB). Authors are strongly encouraged to follow the MIRIAM guidelines (see link list at top right) and deposit their model in a public database such as Biomedels (see link list at top right) or JWS Online (see link list at top right). If computer source code is provided with the paper, it should be deposited in a public repository or included in supplementary information. | Table EV9. As requested by Reviewer 2, all model coefficients for the NOD classifier used to preprocess CyTOF data are provided in XLSX format.                                                                                                                                             |

#### G- Dual use research of concern

|                                                                                                                                                                                                                                                                                               |                                                                   |
|-----------------------------------------------------------------------------------------------------------------------------------------------------------------------------------------------------------------------------------------------------------------------------------------------|-------------------------------------------------------------------|
| 23. Could your study fall under dual use research restrictions? Please check biosecurity documents (see link list at top right) and list of select agents and toxins (APHIS/CDC) (see link list at top right). According to our biosecurity guidelines, provide a statement only if it could. | NA: This study does not fall under dual use research restrictions |
|-----------------------------------------------------------------------------------------------------------------------------------------------------------------------------------------------------------------------------------------------------------------------------------------------|-------------------------------------------------------------------|
